# Supplementary figures and images for: Synthesis, in-vitro cytotoxicity of 1H-benzo[f]chromene derivatives and structure–activity relationships of the 1-aryl group and 9-position
Source: publisher site journal article supplement (doi:10.1515/znc-2016-0139), 2016-11-10

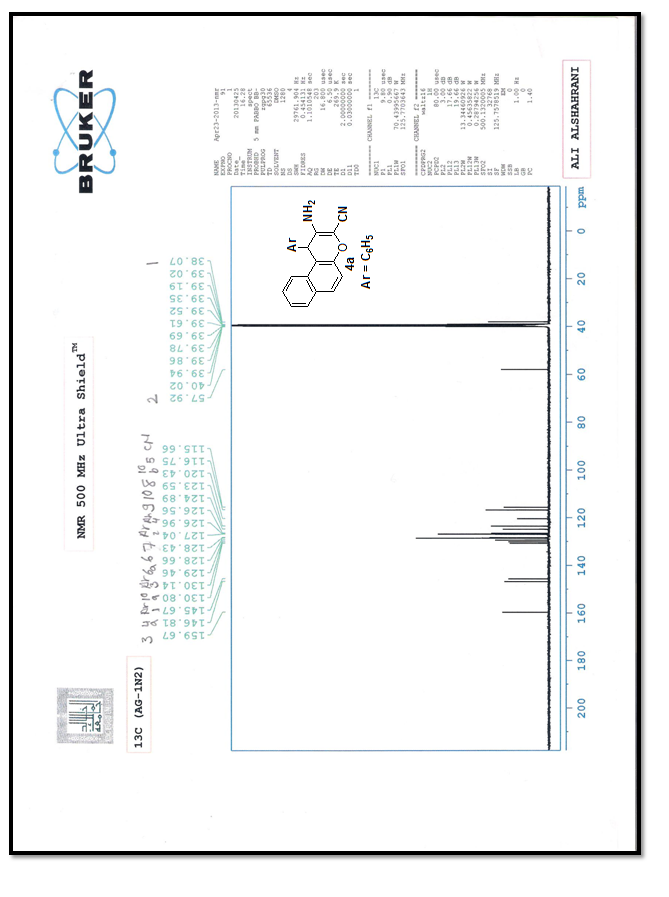

Supplement: Supplementary file 1 [file 4a_13C_NMR.docx]

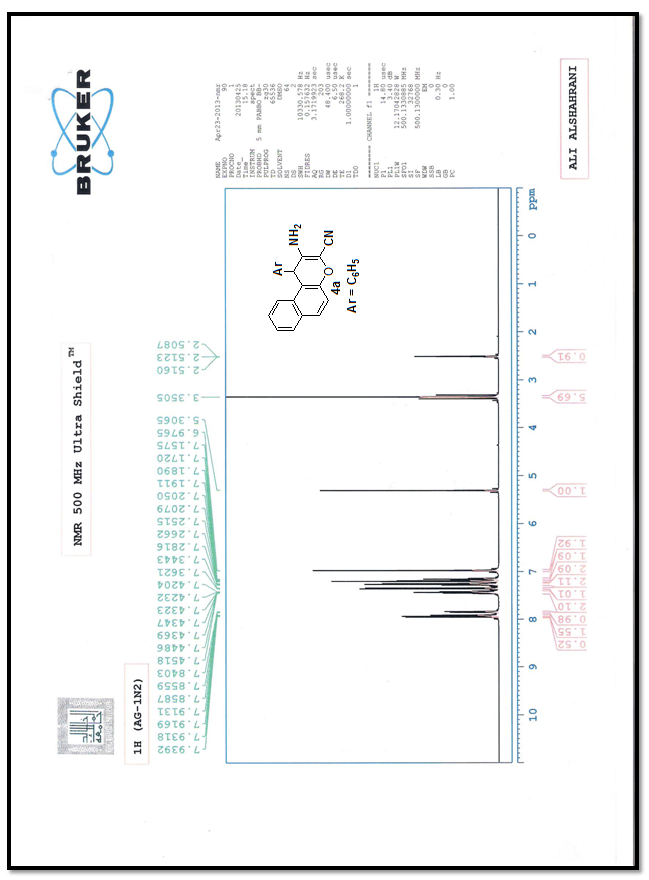

Supplement: Supplementary file 2 [file 4a_1H_NMR.docx]

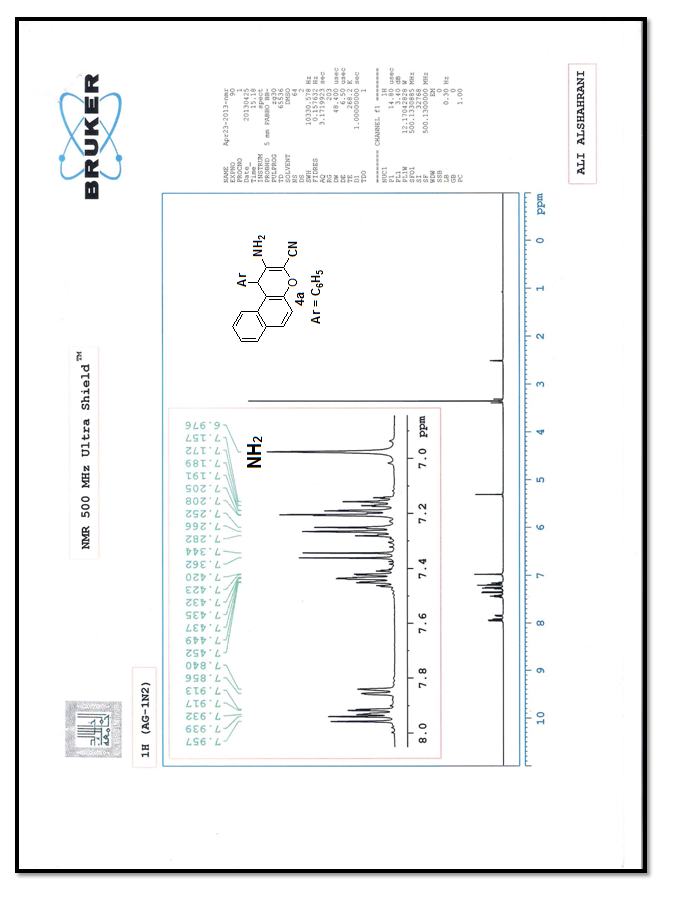

Supplement: Supplementary file 3 [file 4a_1H_NMR_8-6_ppm.docx]

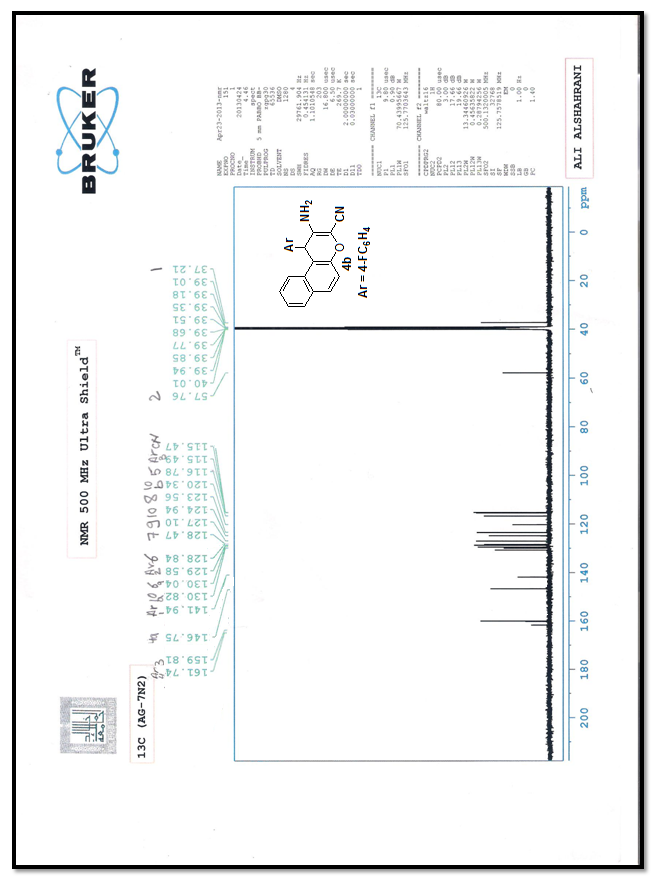

Supplement: Supplementary file 4 [file 4b_13C_NMR.docx]

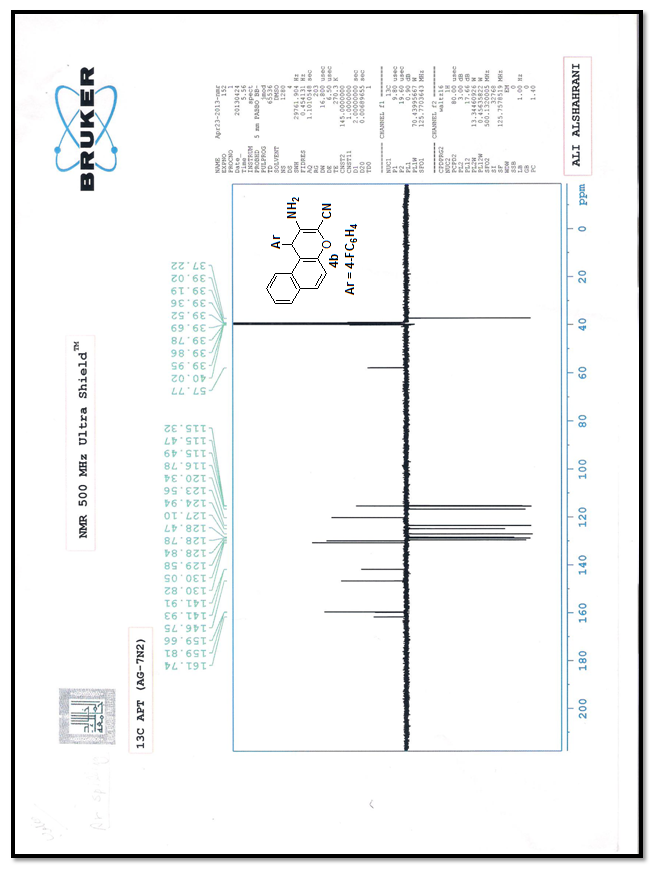

Supplement: Supplementary file 5 [file 4b_13C_NMR_APT.docx]

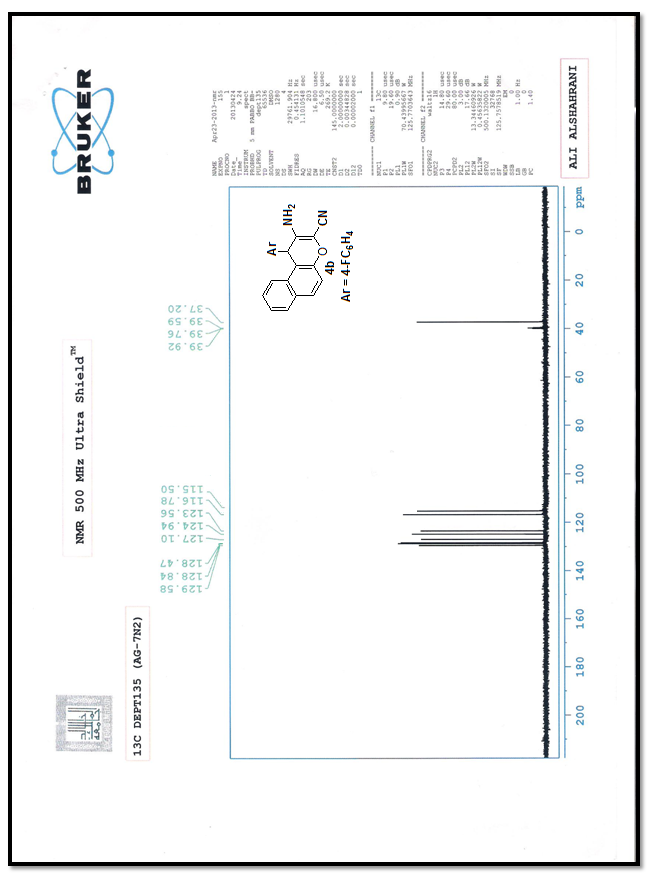

Supplement: Supplementary file 6 [file 4b_13C_NMR_DEPT_135.docx]

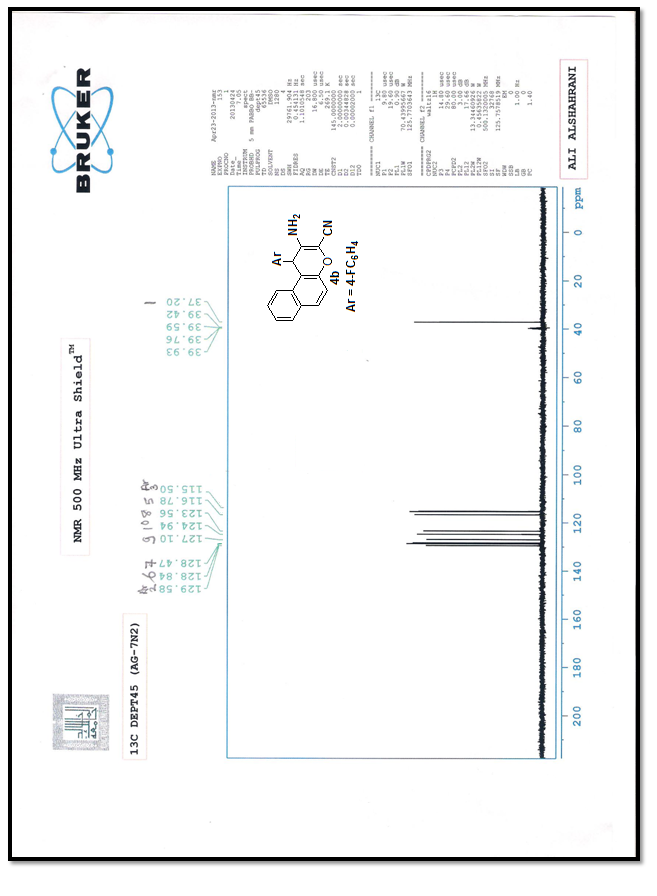

Supplement: Supplementary file 7 [file 4b_13C_NMR_DEPT_45.docx]

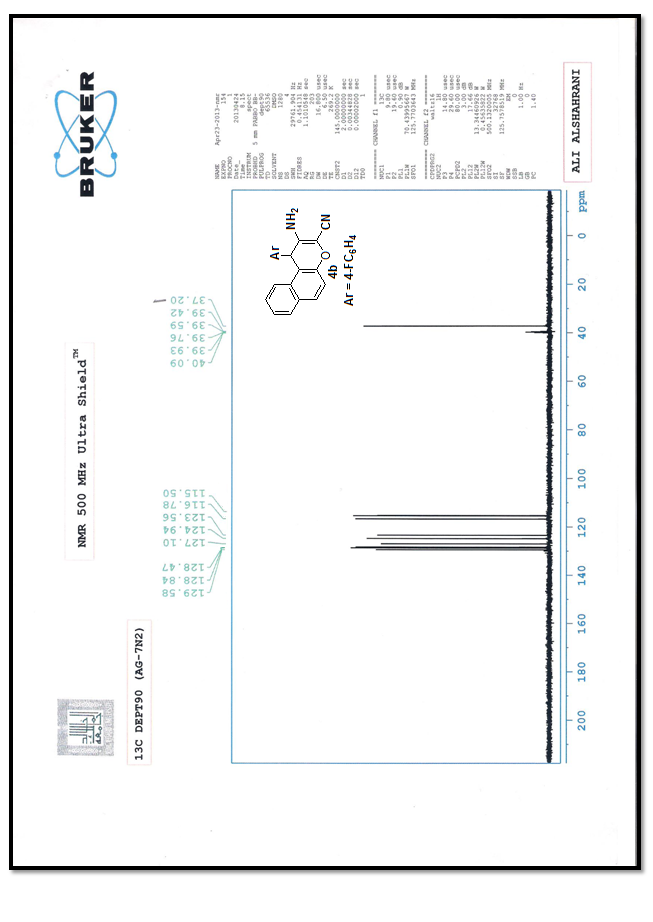

Supplement: Supplementary file 8 [file 4b_13C_NMR_DEPT_90.docx]

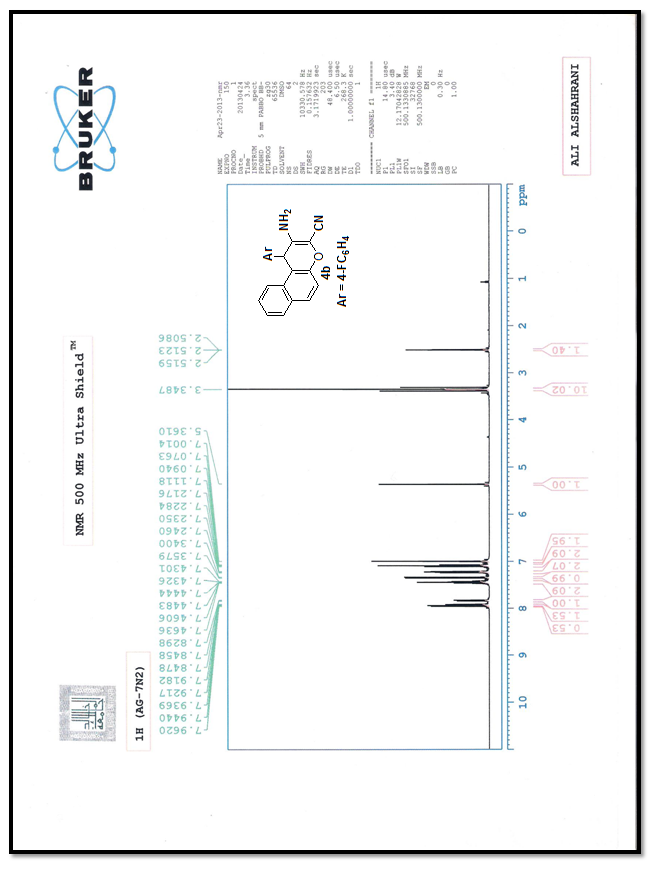

Supplement: Supplementary file 9 [file 4b_1H_NMR(1).docx]

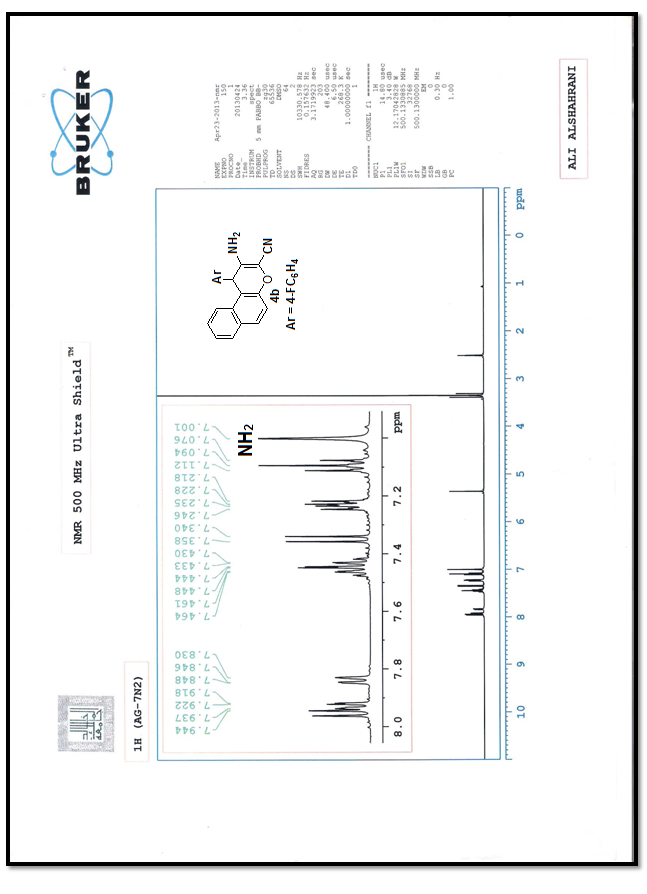

Supplement: Supplementary file 11 [file 4b_1H_NMR_8-6_ppm.docx]

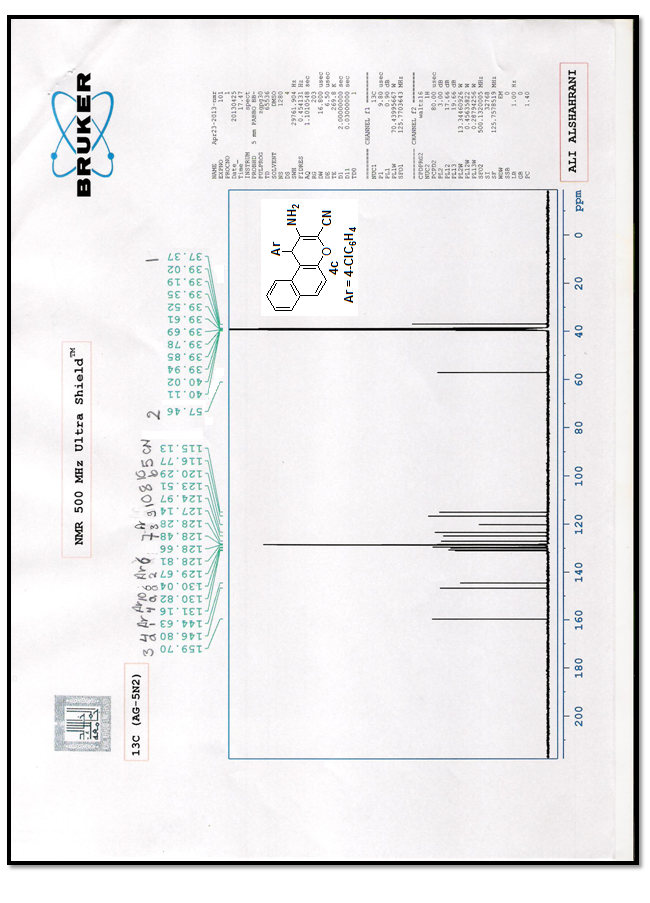

Supplement: Supplementary file 12 [file 4c_13C_NMR.docx]

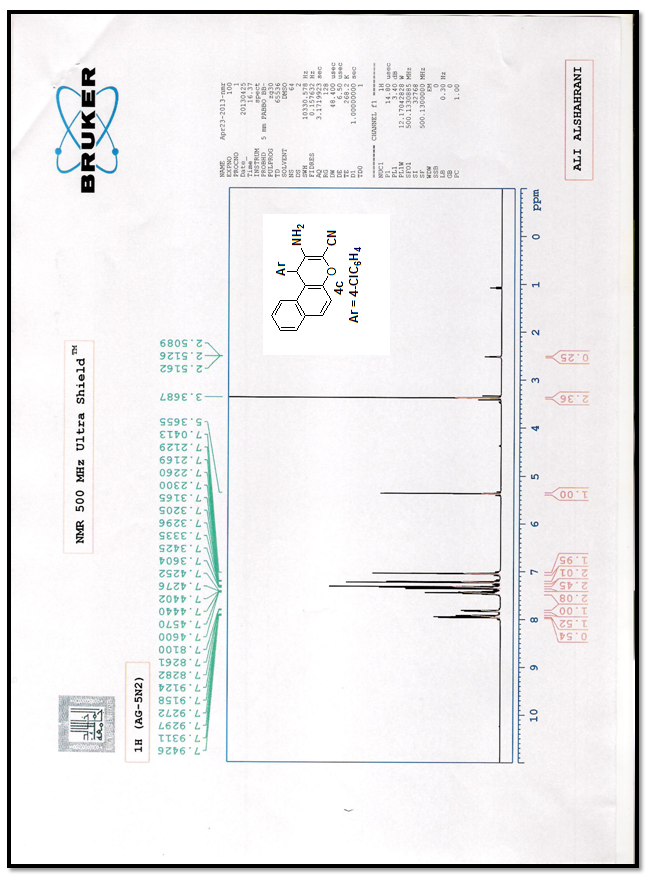

Supplement: Supplementary file 13 [file 4c_1H_NMR.docx]

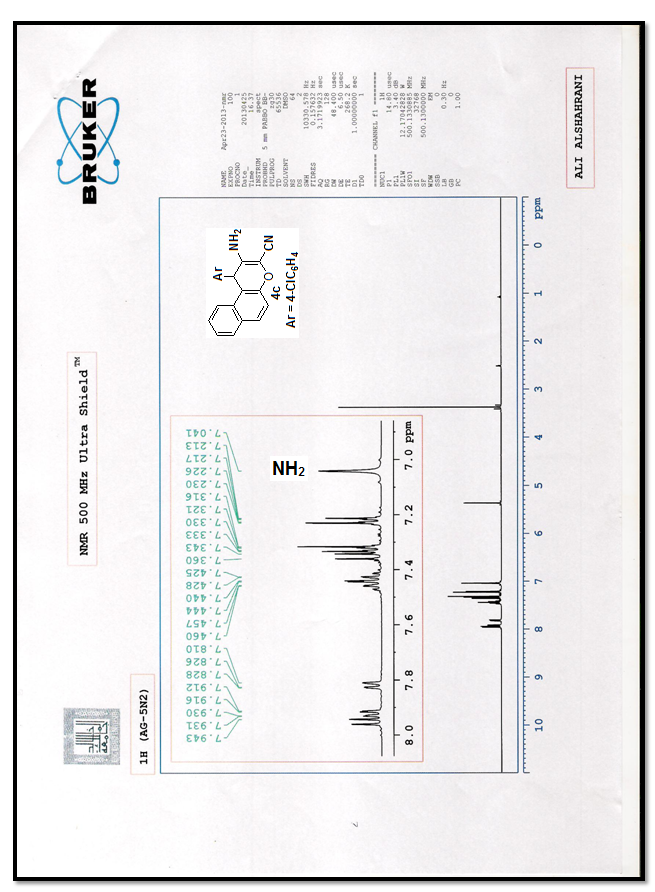

Supplement: Supplementary file 14 [file 4c_1H_NMR_8-6_ppm.docx]

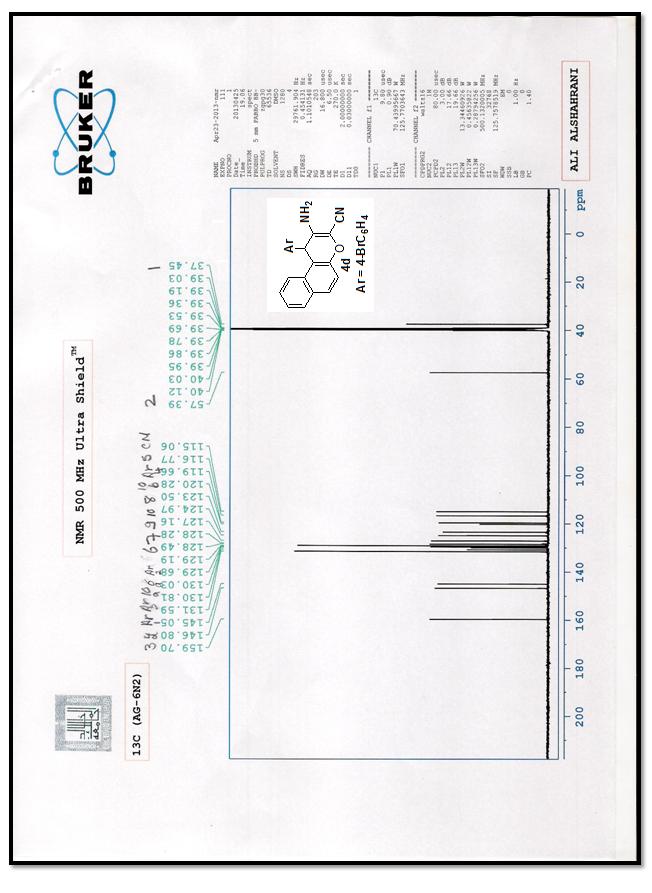

Supplement: Supplementary file 15 [file 4d_13C_NMR.docx]

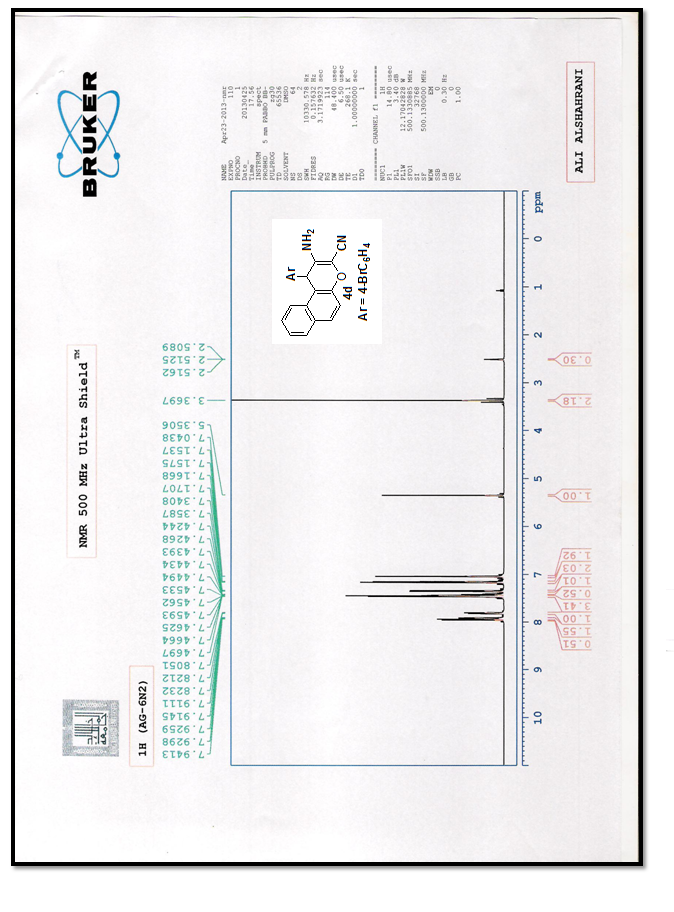

Supplement: Supplementary file 16 [file 4d_1H_NMR.docx]

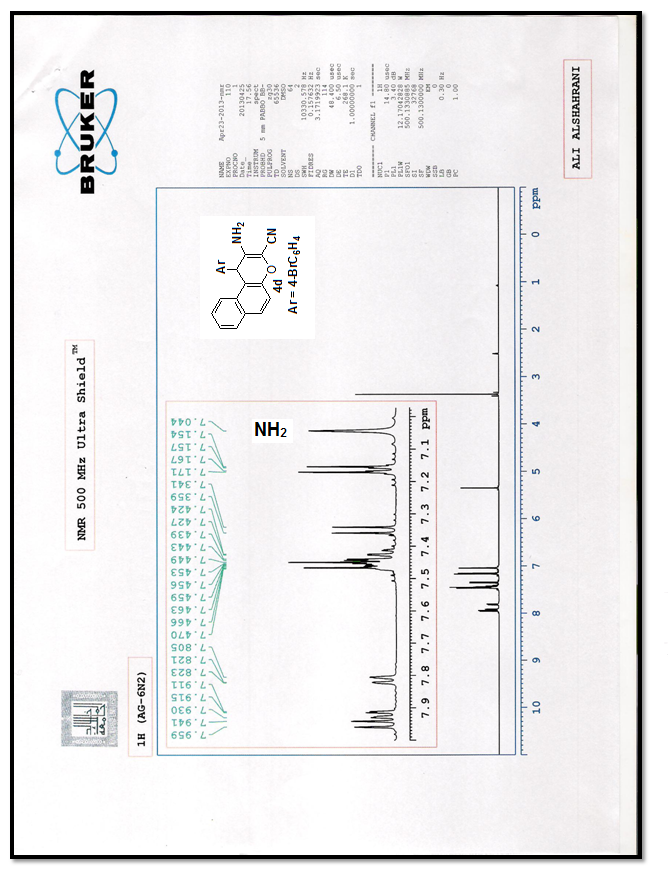

Supplement: Supplementary file 17 [file 4d_1H_NMR_8-6_ppm.docx]

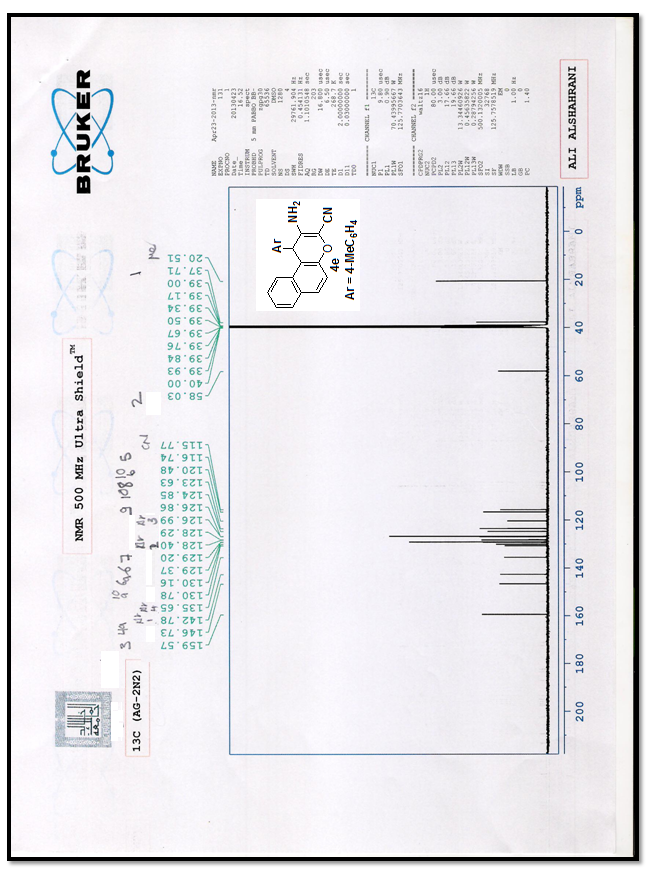

Supplement: Supplementary file 18 [file 4e_13C_NMR.docx]

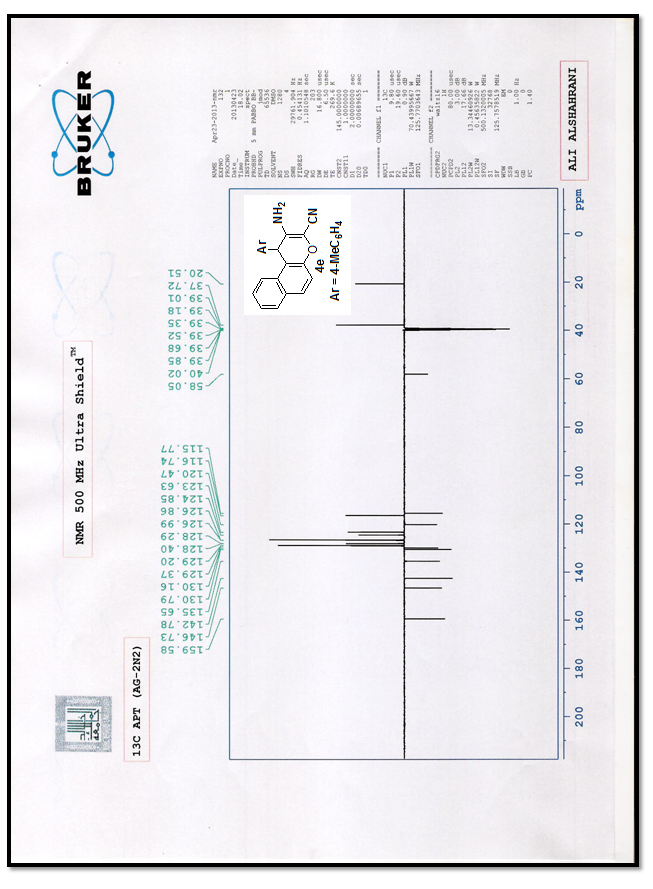

Supplement: Supplementary file 19 [file 4e_13C_NMR_APT.docx]

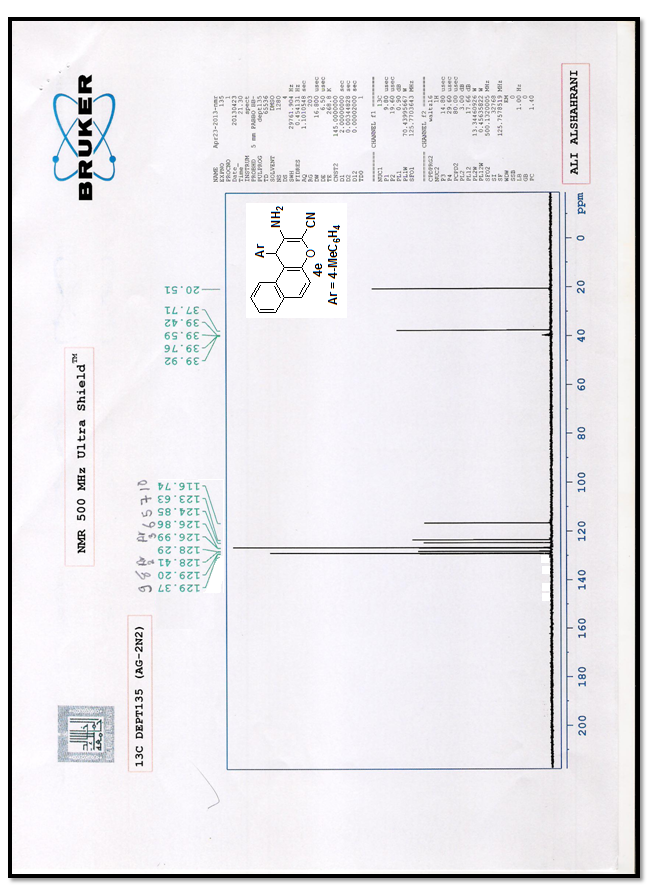

Supplement: Supplementary file 20 [file 4e_13C_NMR_DEPT_135.docx]

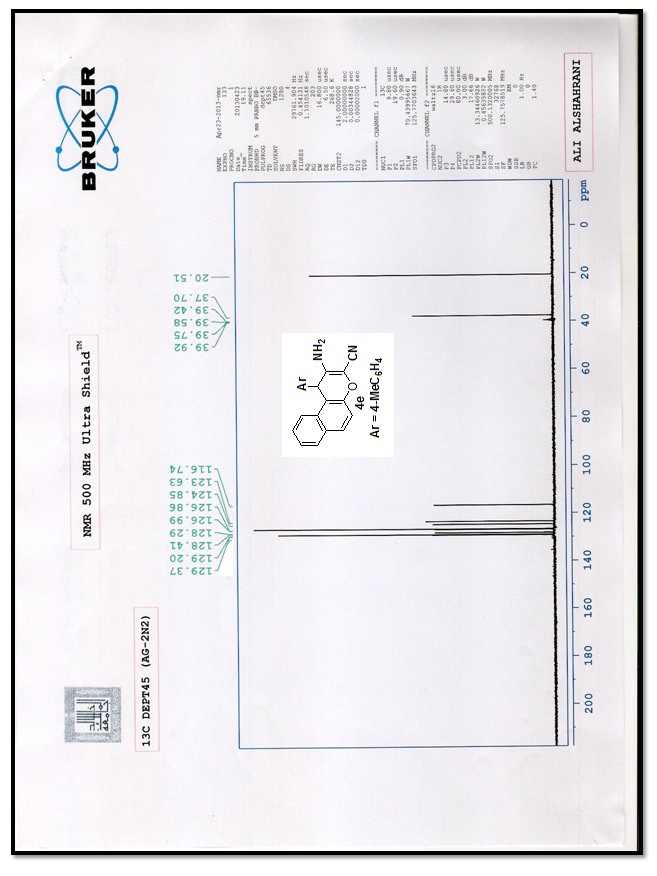

Supplement: Supplementary file 21 [file 4e_13C_NMR_DEPT_45.docx]

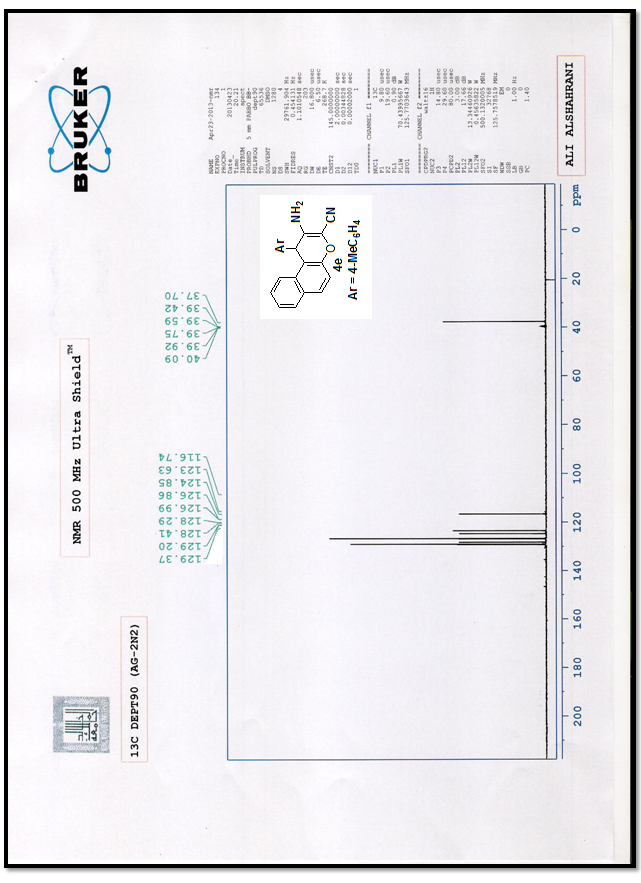

Supplement: Supplementary file 22 [file 4e_13C_NMR_DEPT_90.docx]

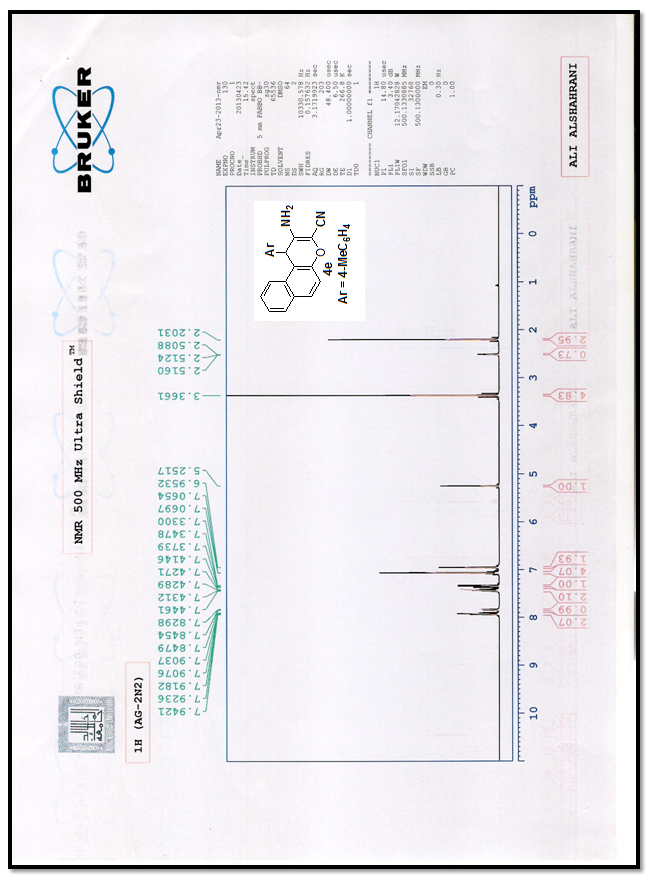

Supplement: Supplementary file 23 [file 4e_1H_NMR.docx]

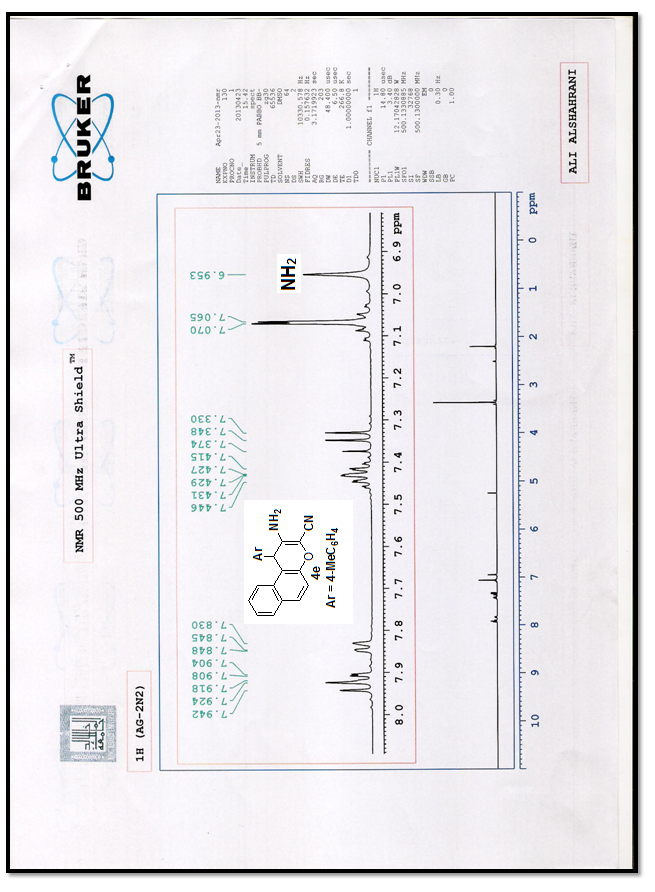

Supplement: Supplementary file 24 [file 4e_1H_NMR_8-6_ppm.docx]

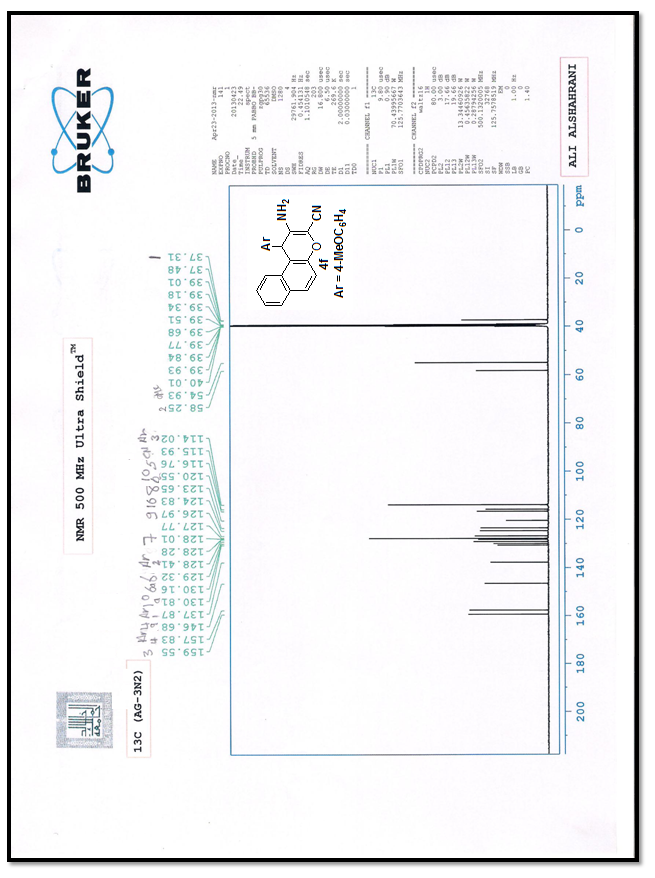

Supplement: Supplementary file 25 [file 4f_13C_NMR.docx]

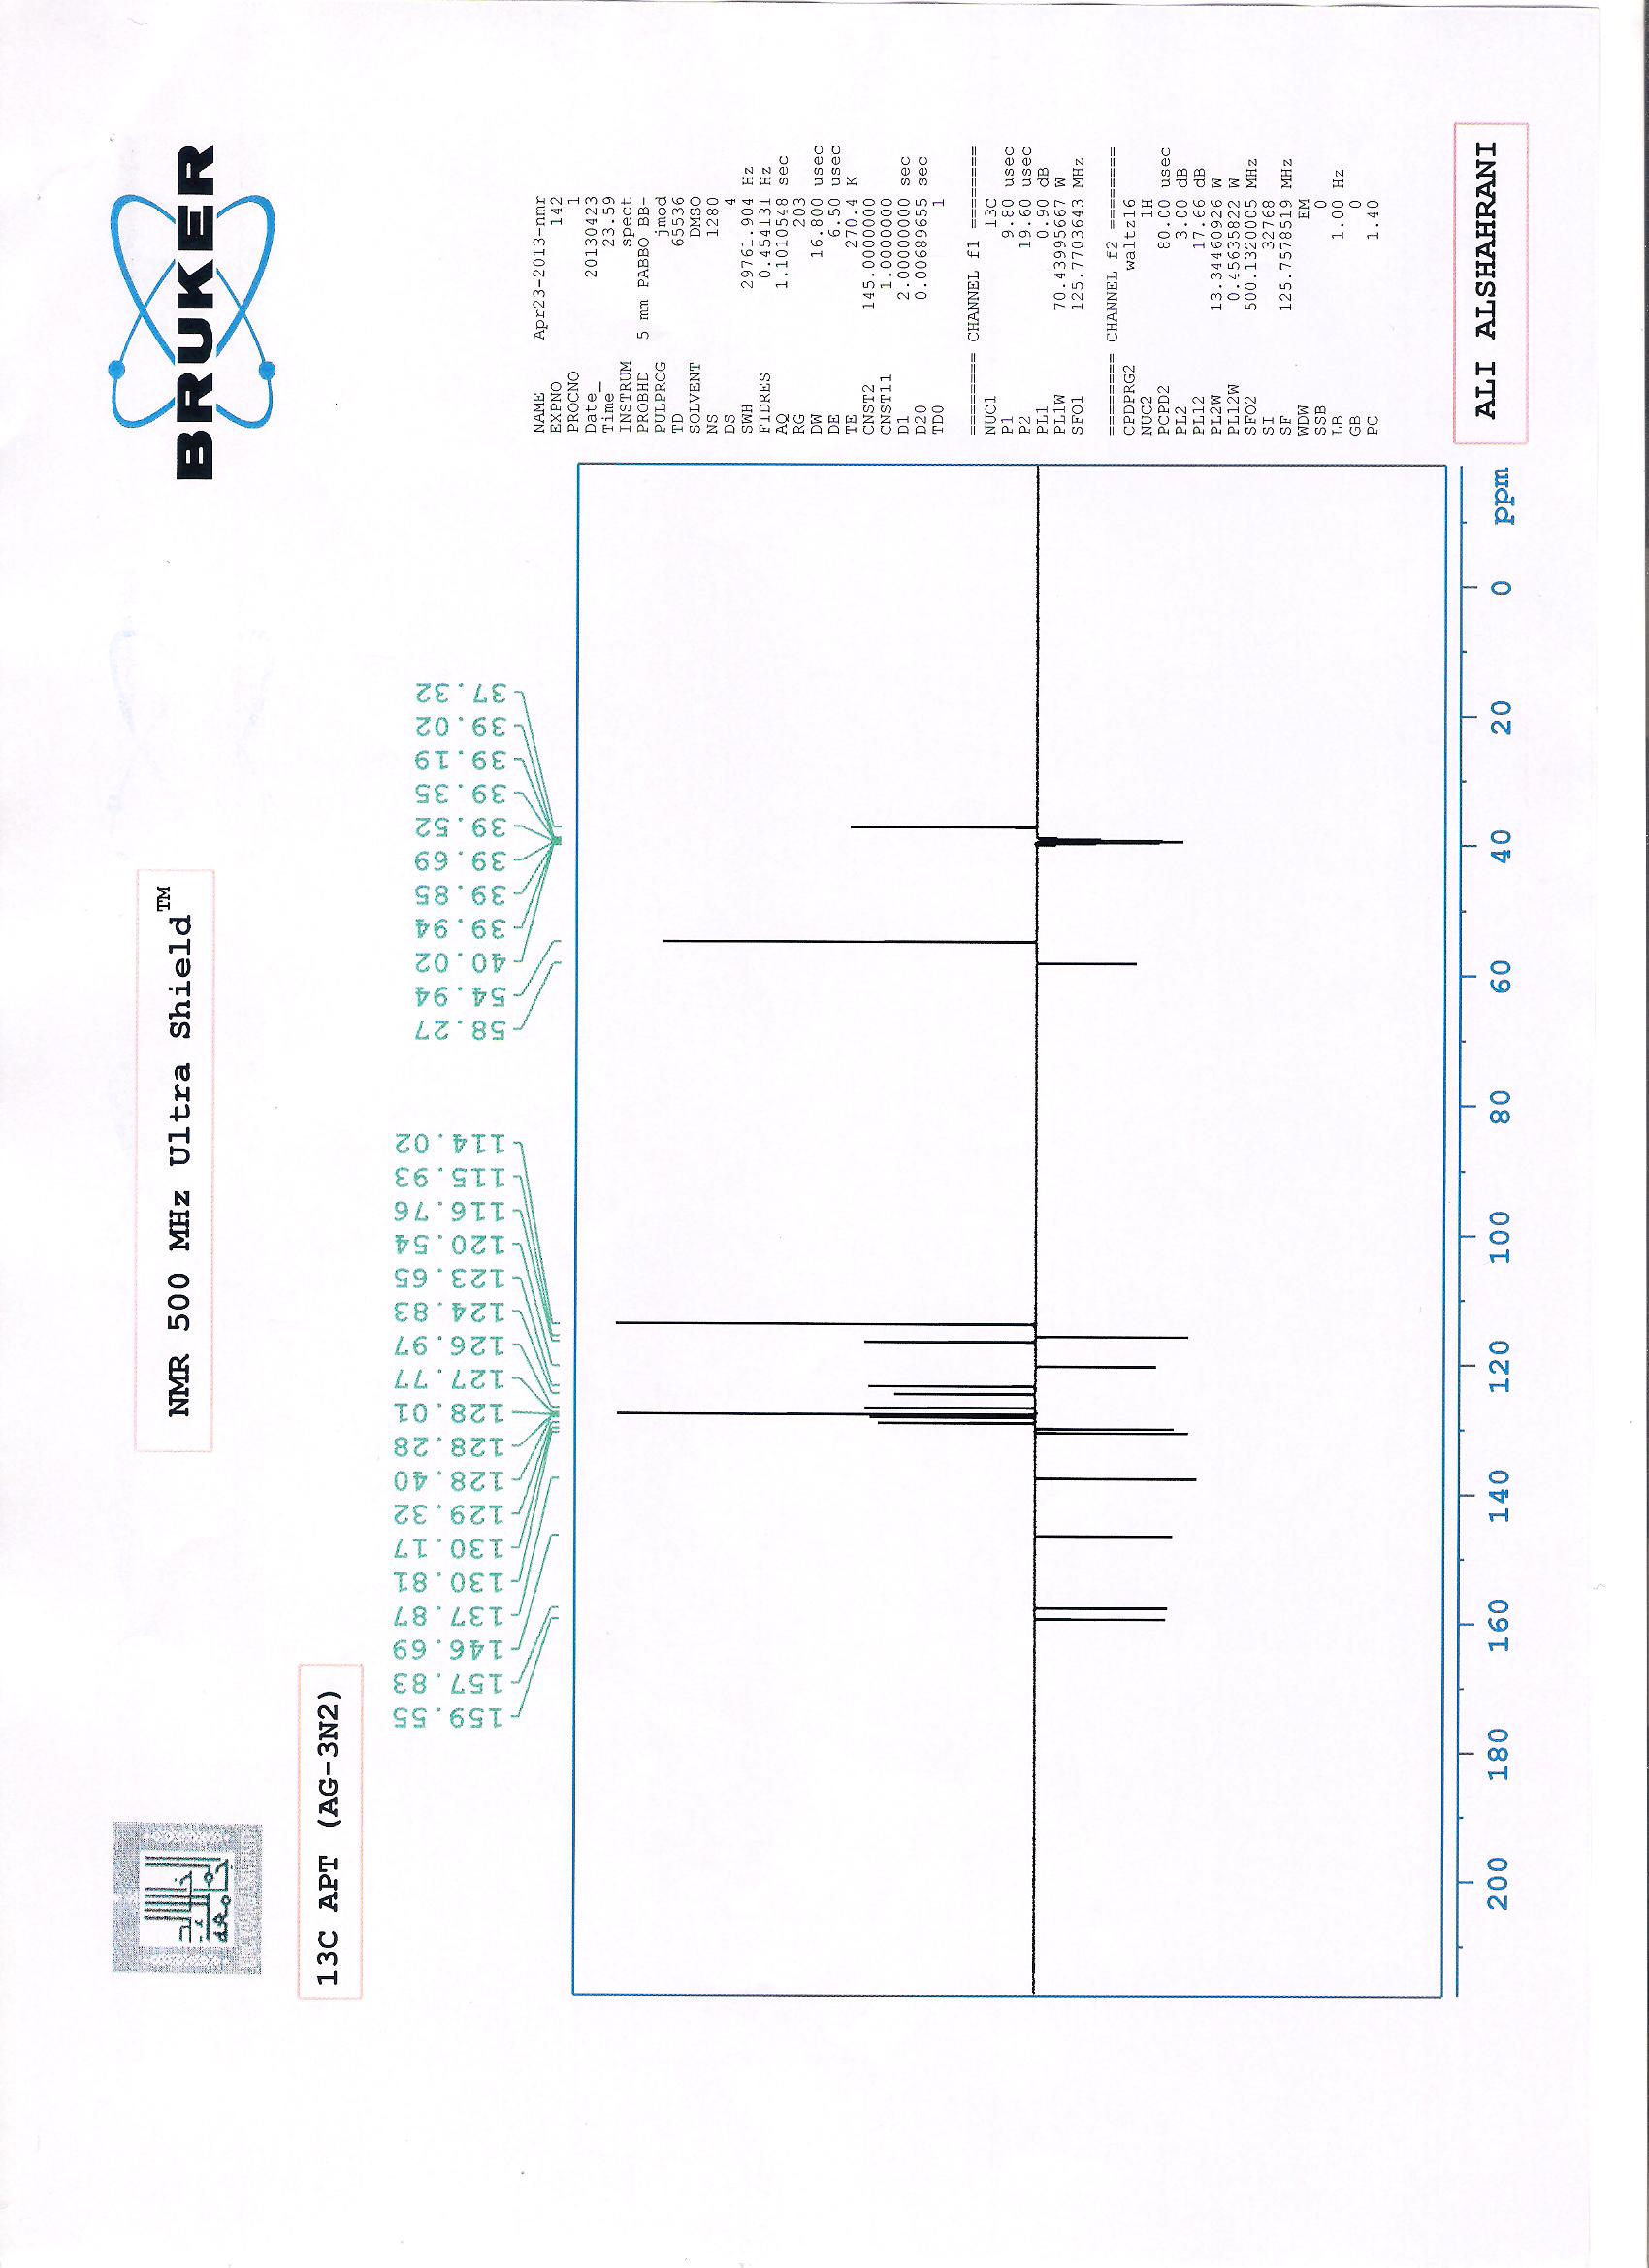

Supplement: Supplementary file 26 [file 4f_13C_NMR_APT.docx]

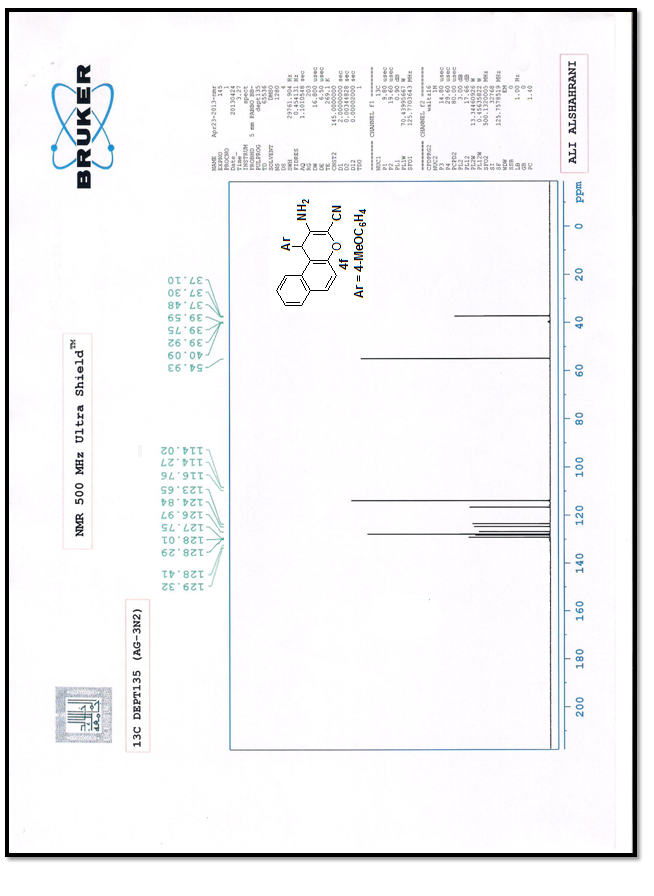

Supplement: Supplementary file 27 [file 4f_13C_NMR_DEPT_135.docx]

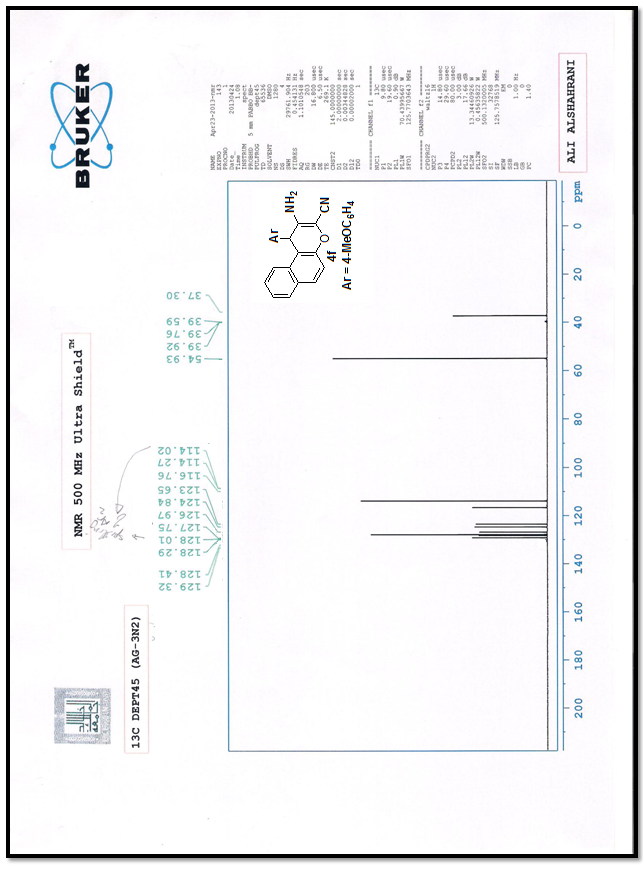

Supplement: Supplementary file 28 [file 4f_13C_NMR_DEPT_45.docx]

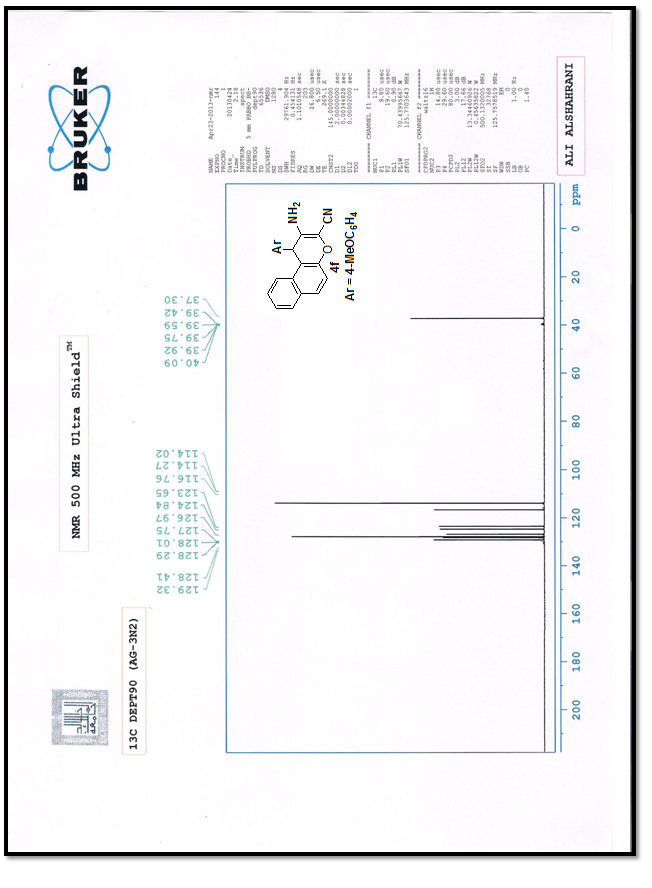

Supplement: Supplementary file 29 [file 4f_13C_NMR_DEPT_90.docx]

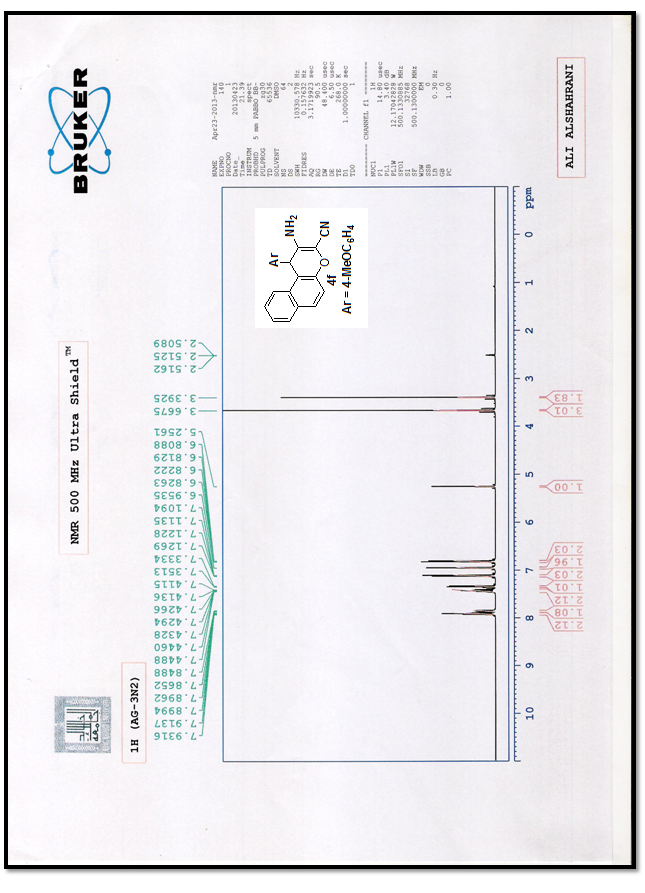

Supplement: Supplementary file 30 [file 4f_1H_NMR.docx]

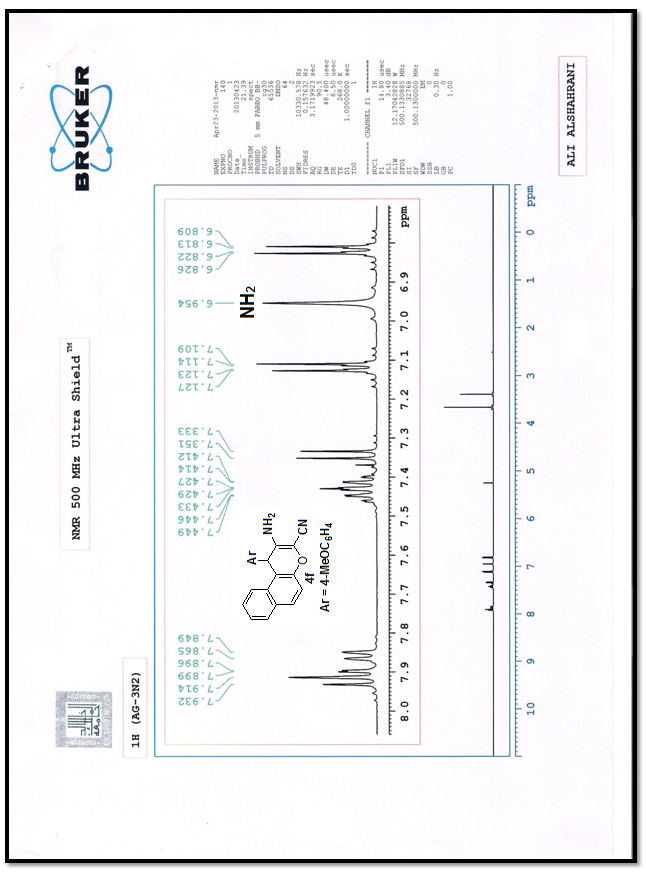

Supplement: Supplementary file 31 [file 4f_1H_NMR_8-6_ppm.docx]

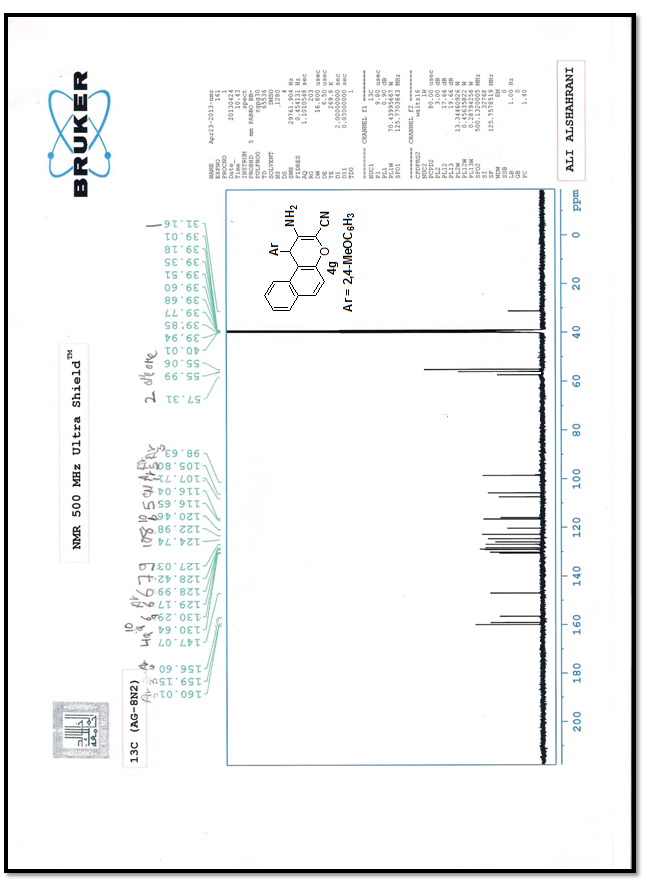

Supplement: Supplementary file 32 [file 4g_13C_NMR.docx]

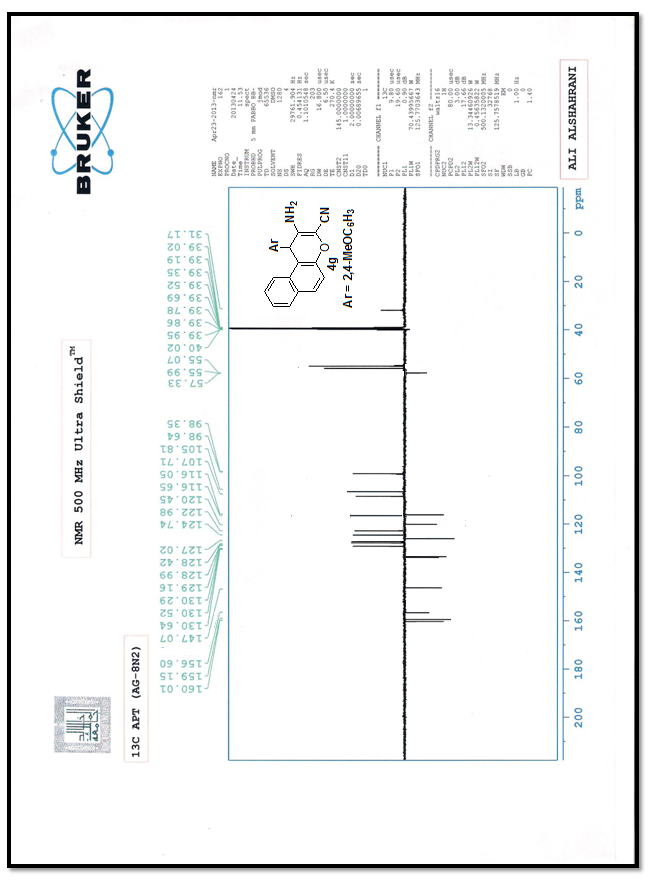

Supplement: Supplementary file 33 [file 4g_13C_NMR_APT.docx]

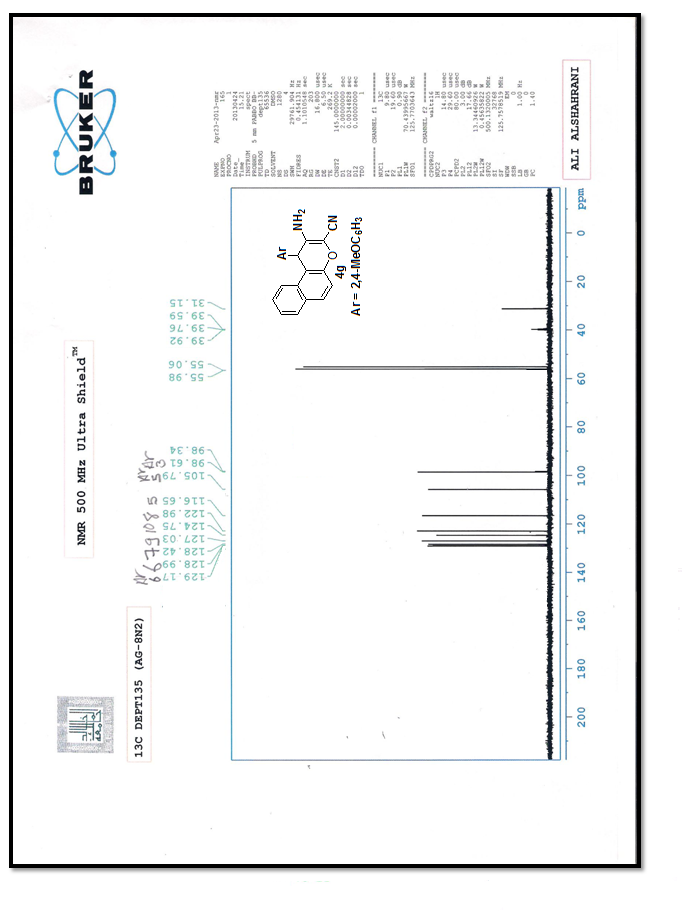

Supplement: Supplementary file 34 [file 4g_13C_NMR_DEPT_135.docx]

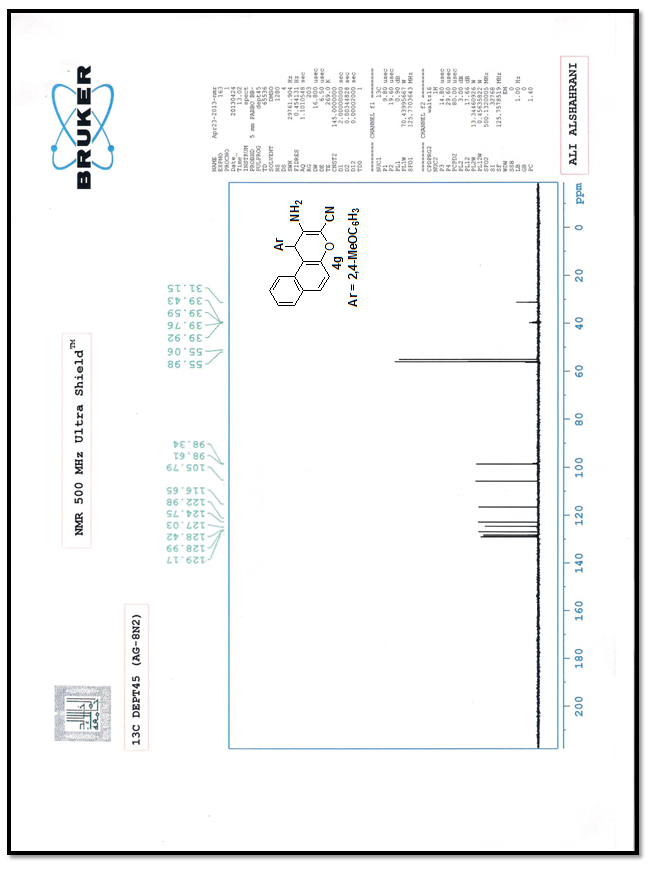

Supplement: Supplementary file 35 [file 4g_13C_NMR_DEPT_45.docx]

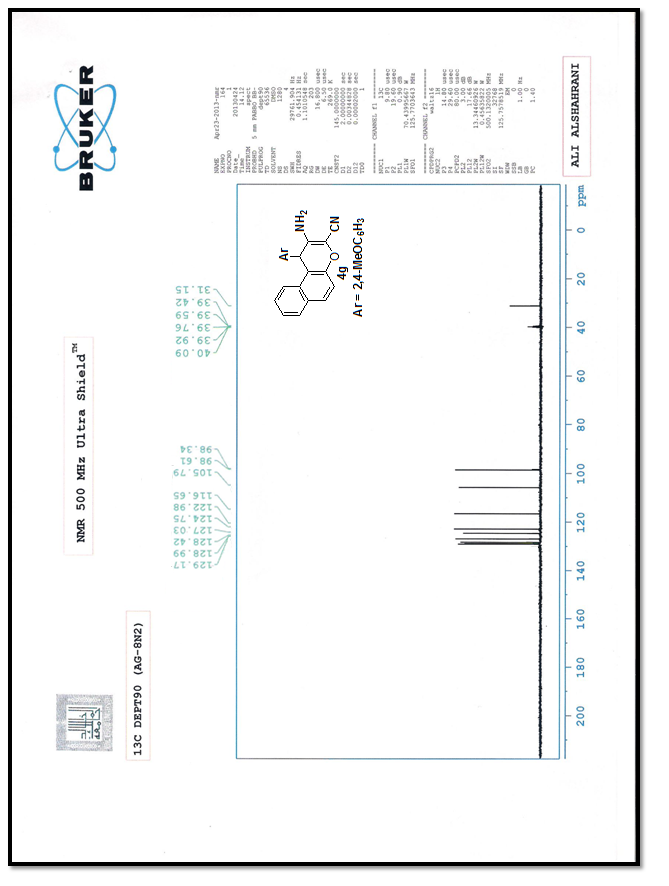

Supplement: Supplementary file 36 [file 4g_13C_NMR_DEPT_90.docx]

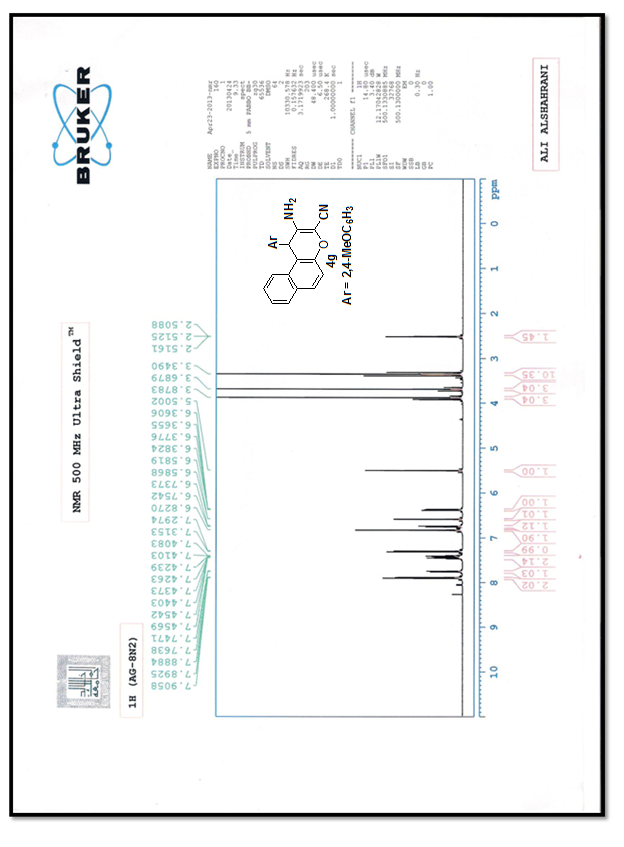

Supplement: Supplementary file 37 [file 4g_1H_NMR.docx]

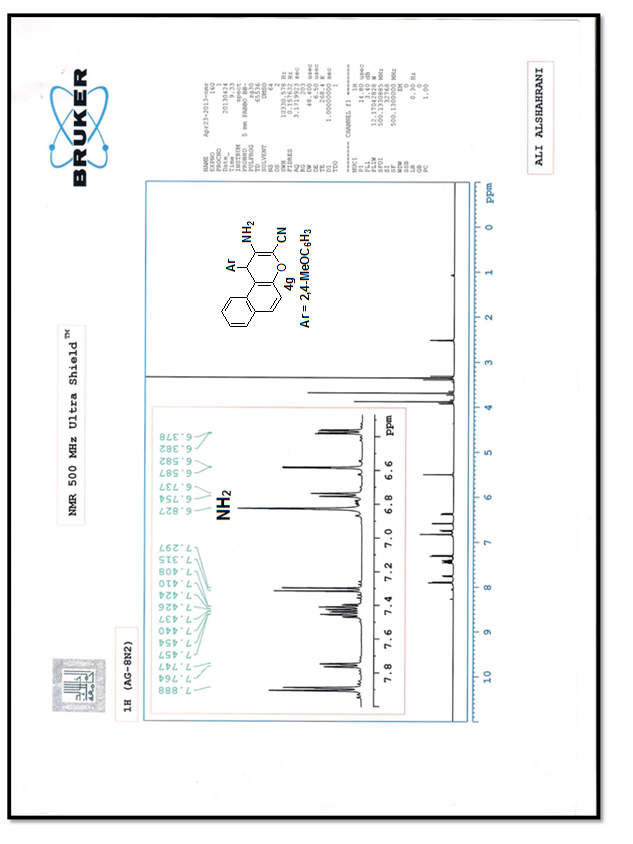

Supplement: Supplementary file 38 [file 4g_1H_NMR_8-6_ppm.docx]

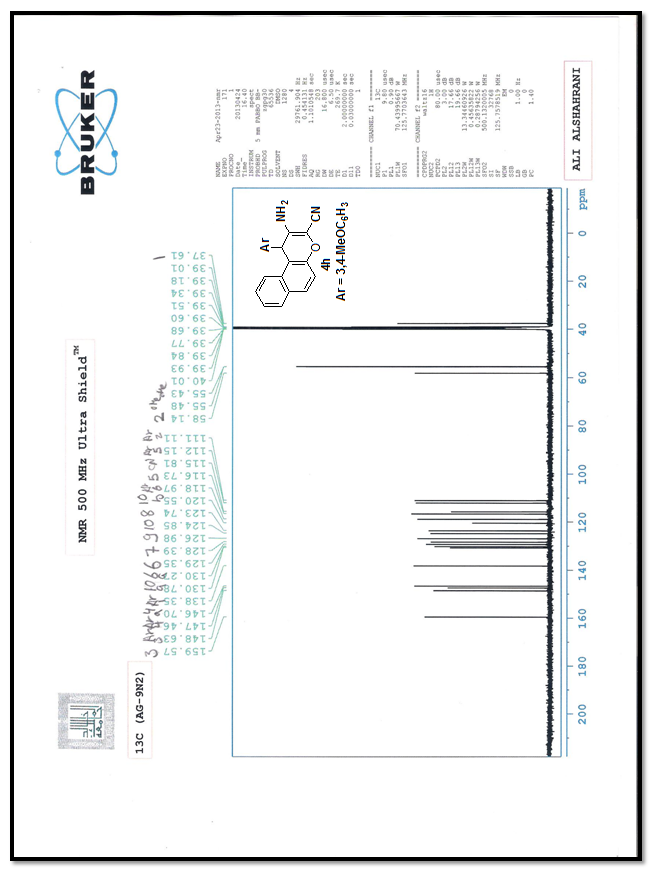

Supplement: Supplementary file 39 [file 4h_13C_NMR.docx]

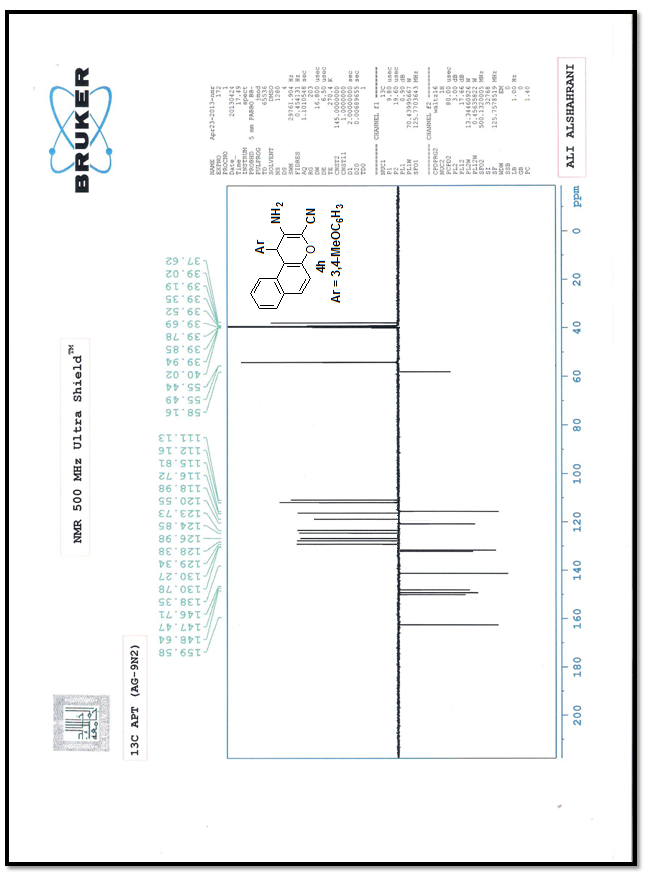

Supplement: Supplementary file 40 [file 4h_13C_NMR_APT.docx]

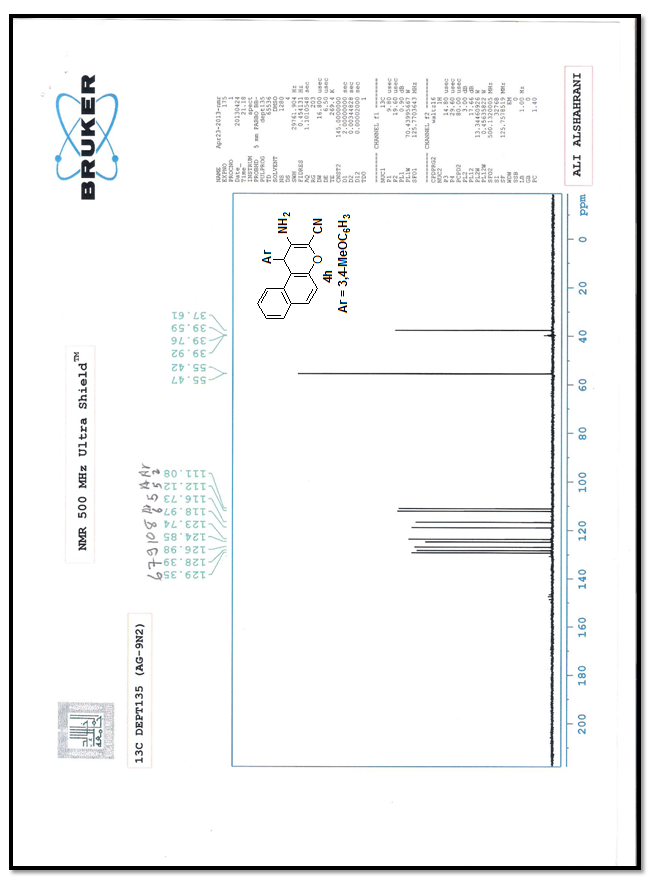

Supplement: Supplementary file 41 [file 4h_13C_NMR_DEPT_135.docx]

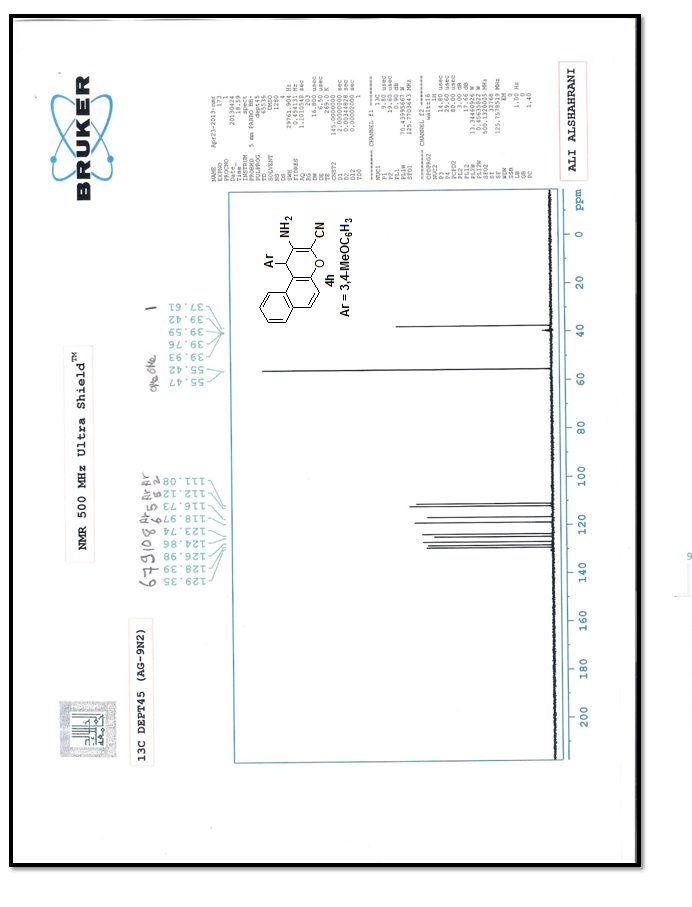

Supplement: Supplementary file 42 [file 4h_13C_NMR_DEPT_45.docx]

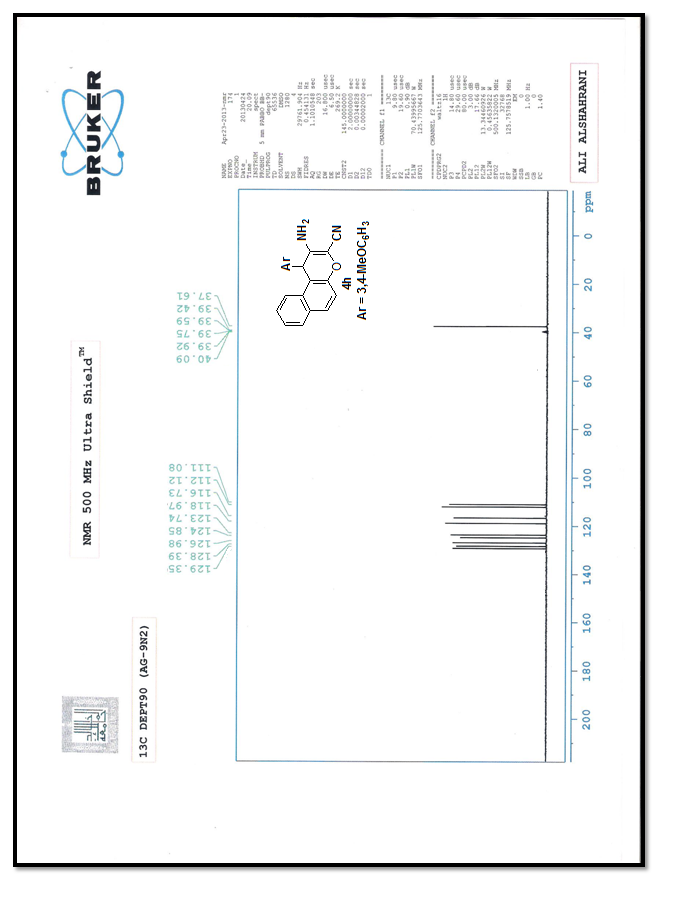

Supplement: Supplementary file 43 [file 4h_13C_NMR_DEPT_90.docx]

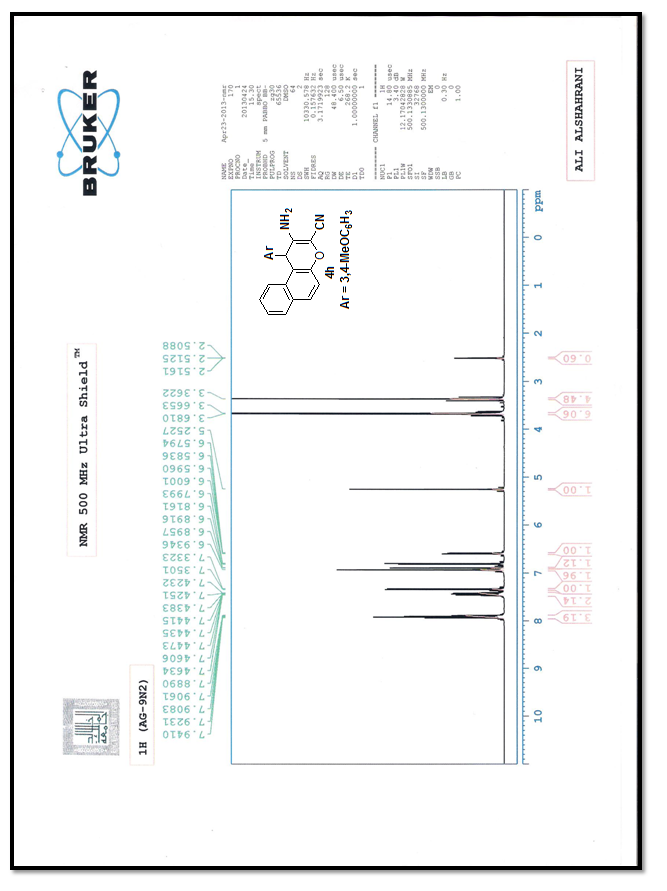

Supplement: Supplementary file 44 [file 4h_1H_NMR.docx]

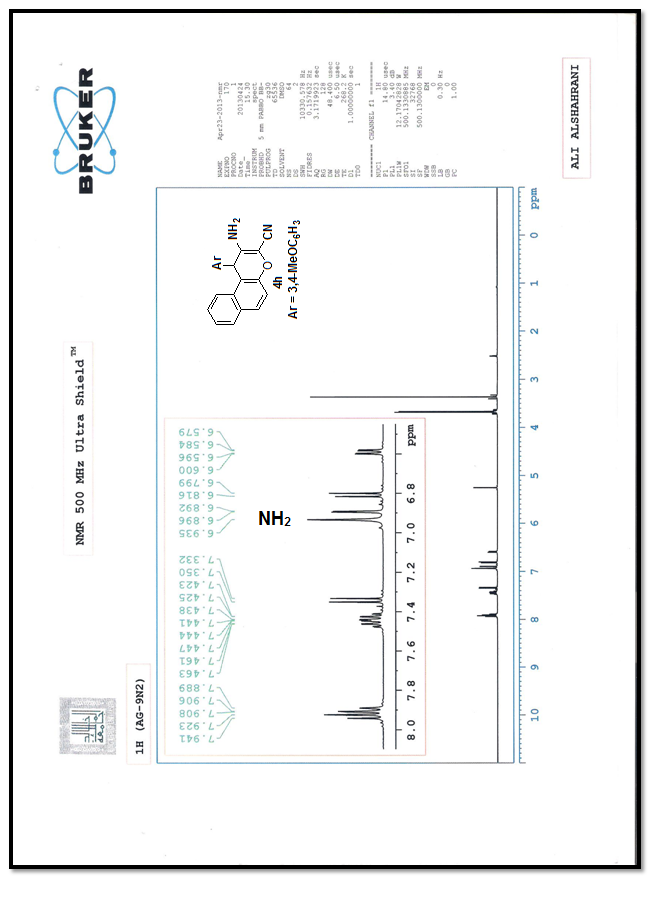

Supplement: Supplementary file 45 [file 4h_1H_NMR_8-6_ppm.docx]

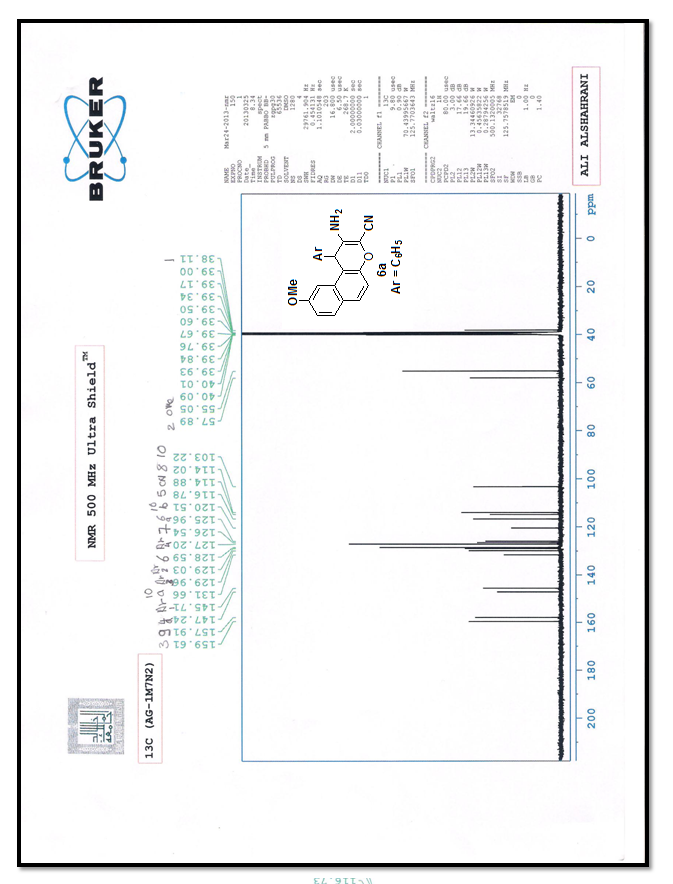

Supplement: Supplementary file 46 [file 6a_13C_NMR.docx]

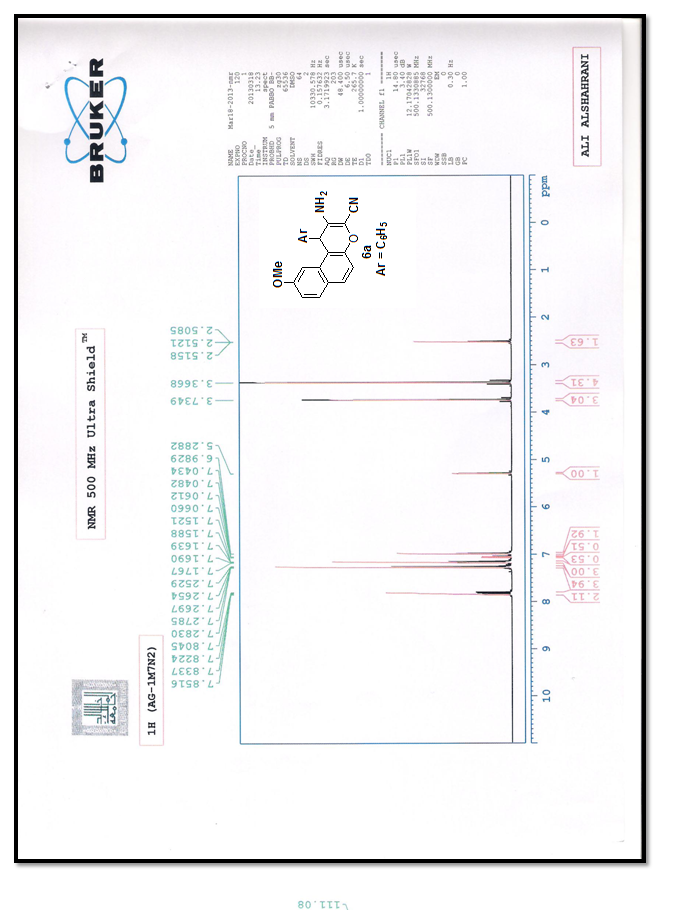

Supplement: Supplementary file 47 [file 6a_1H_NMR.docx]

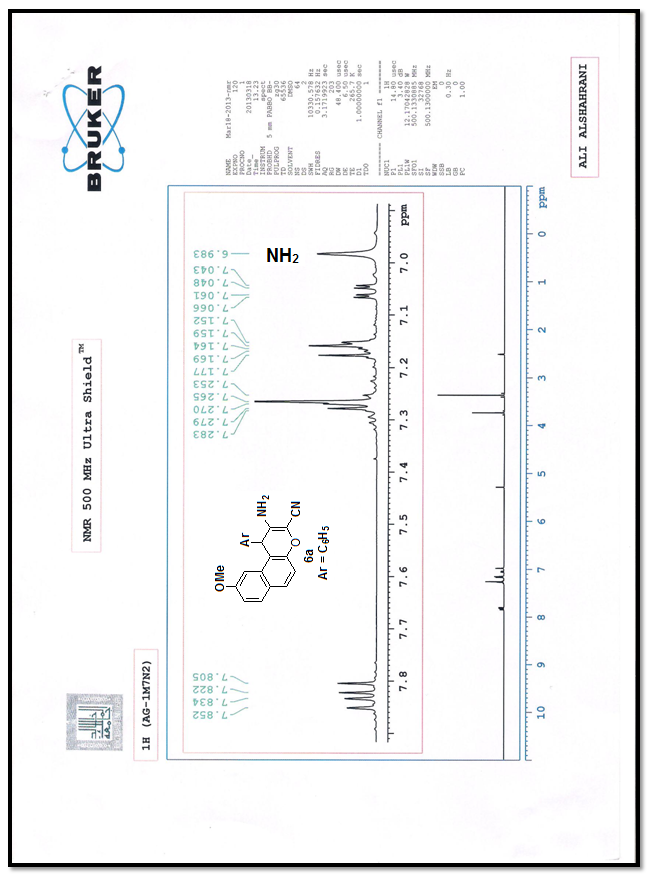

Supplement: Supplementary file 48 [file 6a_1H_NMR_8-6_ppm.docx]

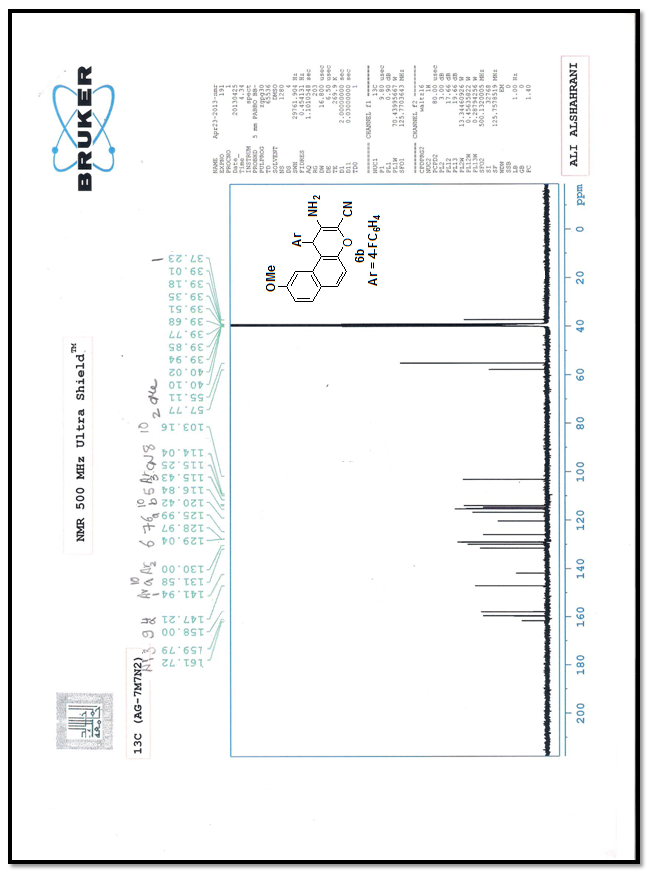

Supplement: Supplementary file 49 [file 6b_13C_NMR.docx]

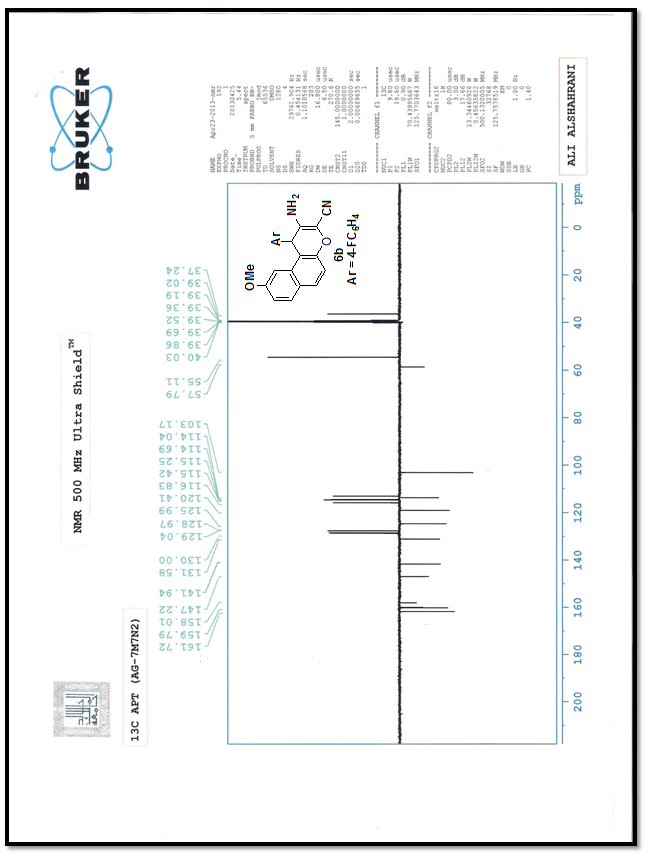

Supplement: Supplementary file 50 [file 6b_13C_NMR_APT.docx]

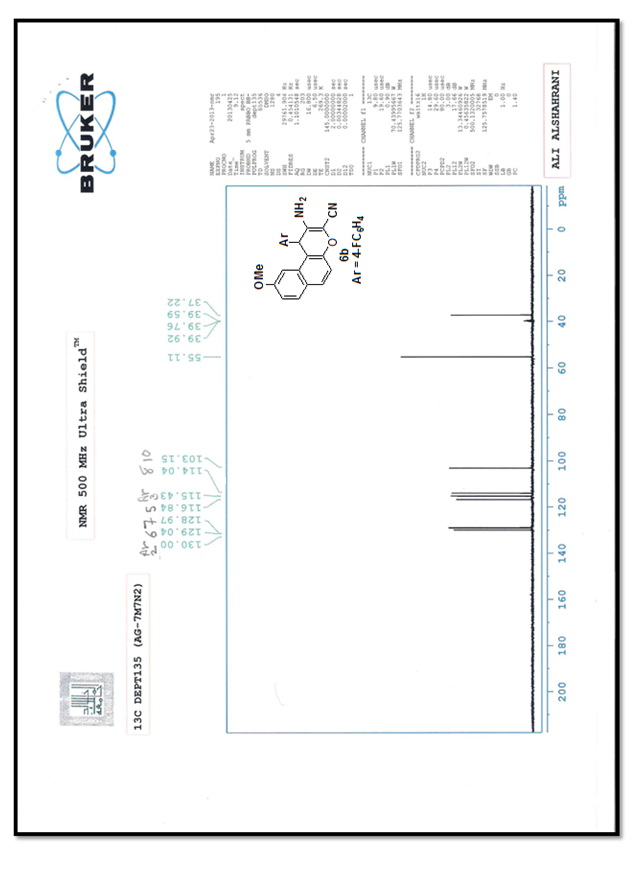

Supplement: Supplementary file 51 [file 6b_13C_NMR_DEPT_135.docx]

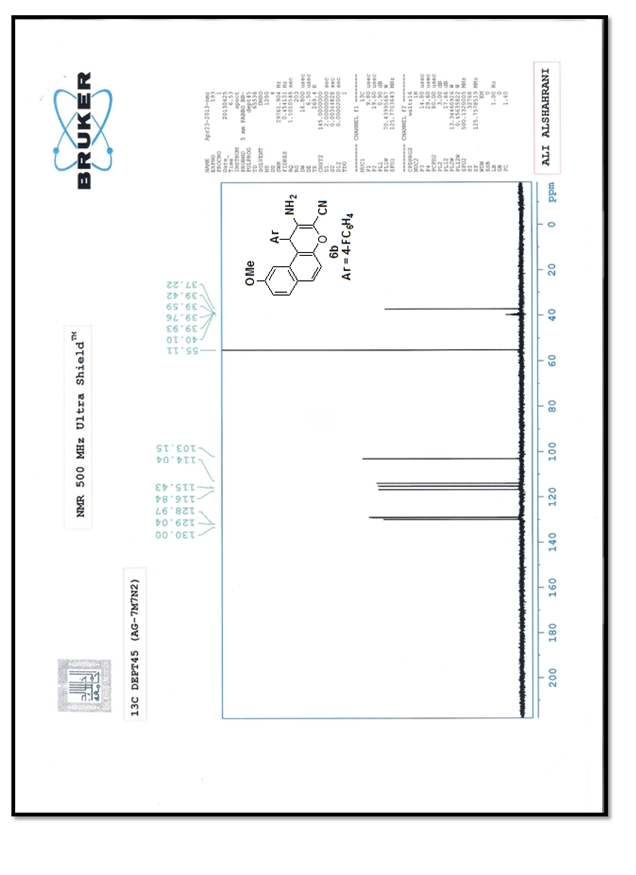

Supplement: Supplementary file 52 [file 6b_13C_NMR_DEPT_45.docx]

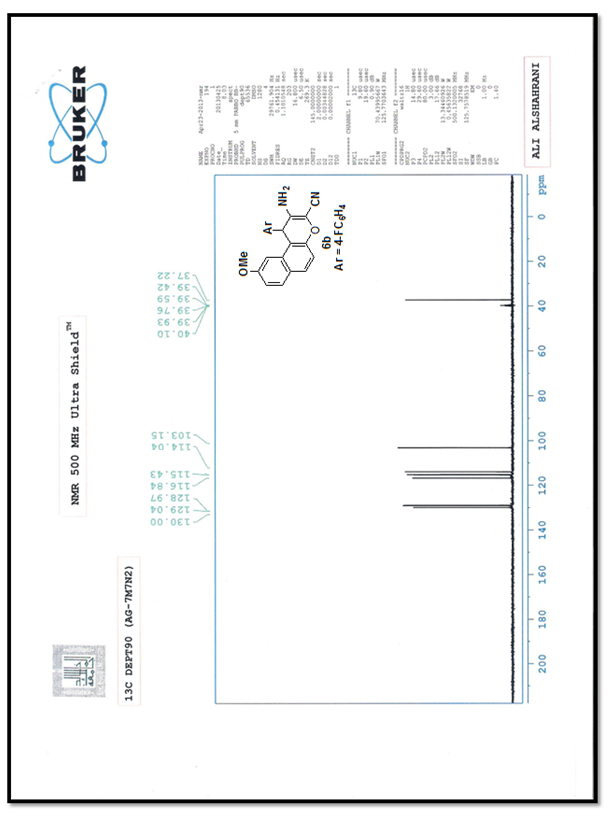

Supplement: Supplementary file 53 [file 6b_13C_NMR_DEPT_90.docx]

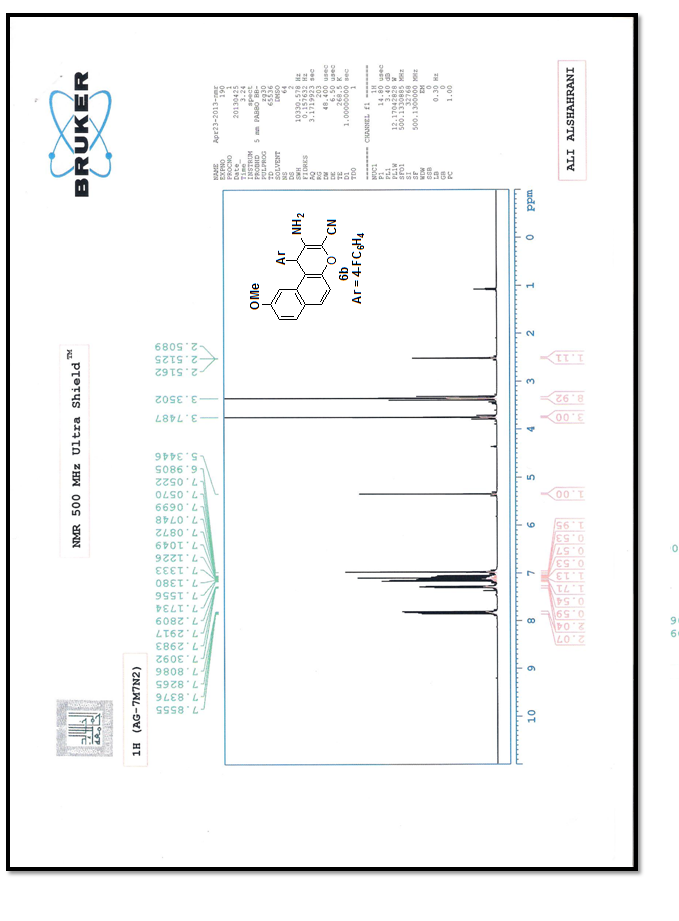

Supplement: Supplementary file 54 [file 6b_1H_NMR.docx]

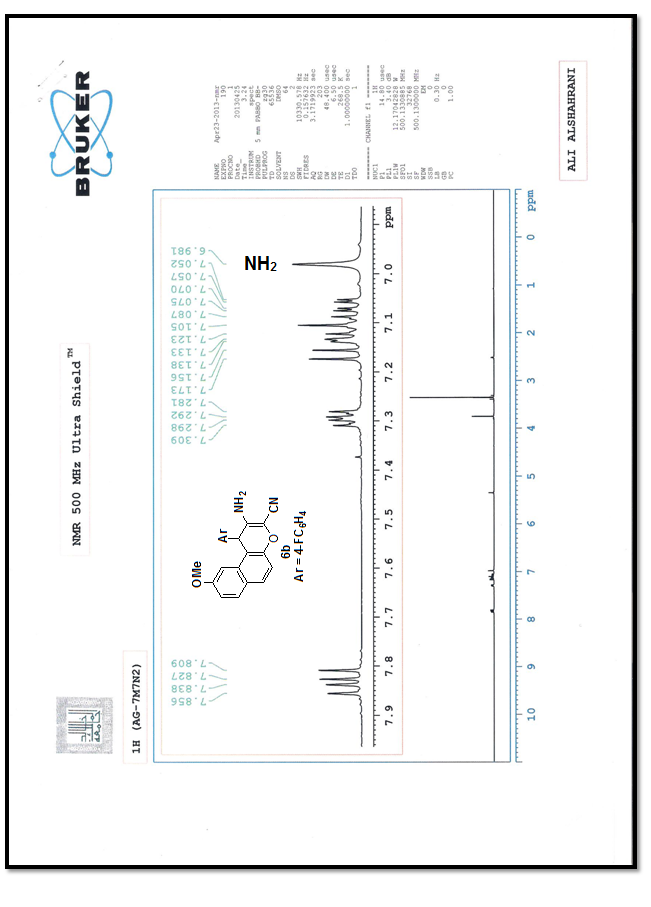

Supplement: Supplementary file 55 [file 6b_1H_NMR_8-6_ppm.docx]

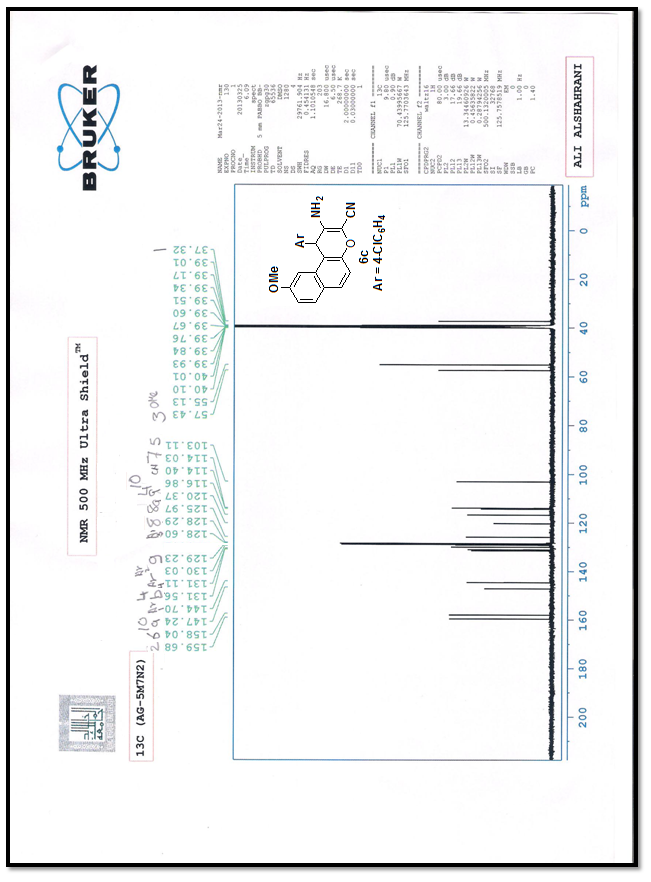

Supplement: Supplementary file 56 [file 6c_13C_NMR.docx]

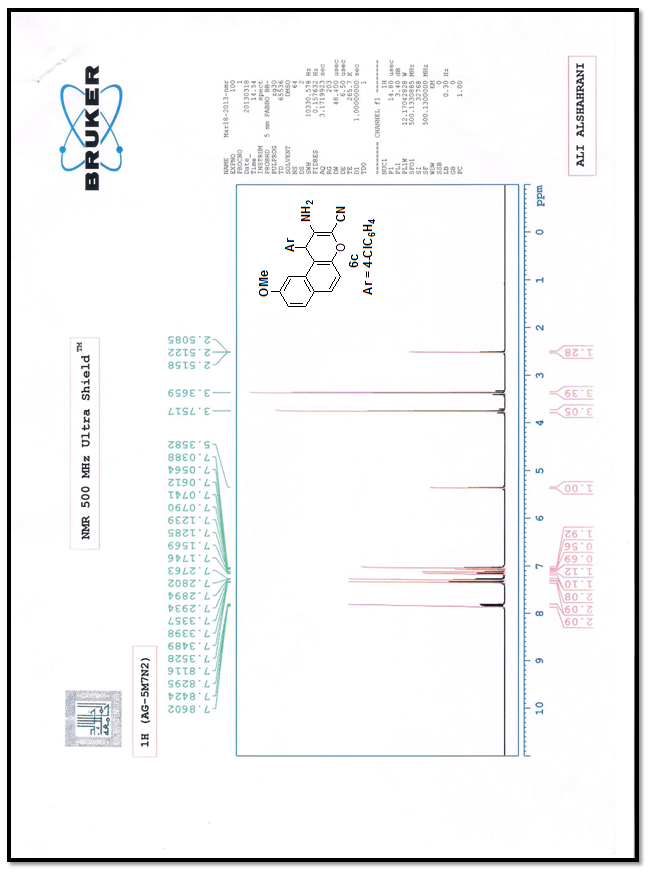

Supplement: Supplementary file 57 [file 6c_1H_NMR.docx]

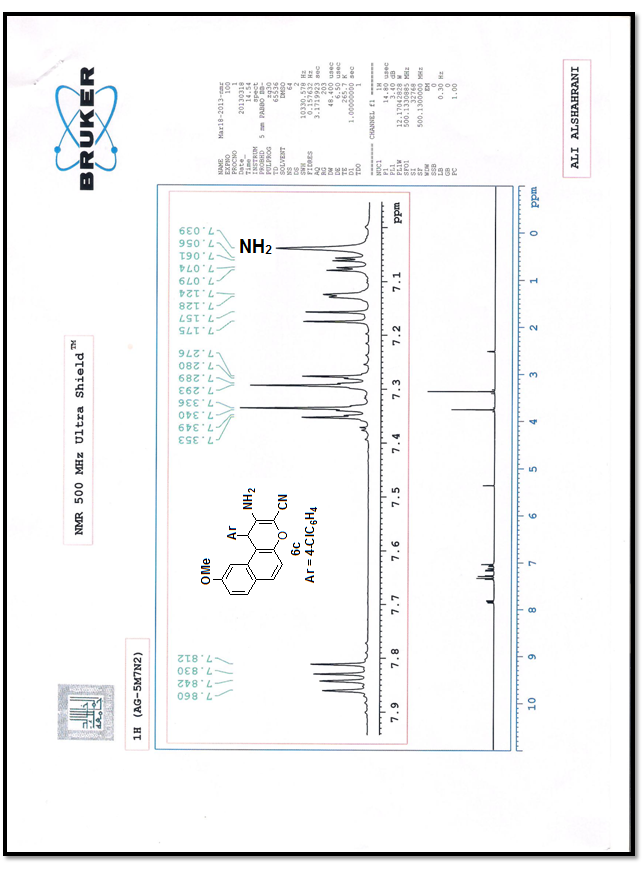

Supplement: Supplementary file 58 [file 6c_1H_NMR_8-6_ppm.docx]

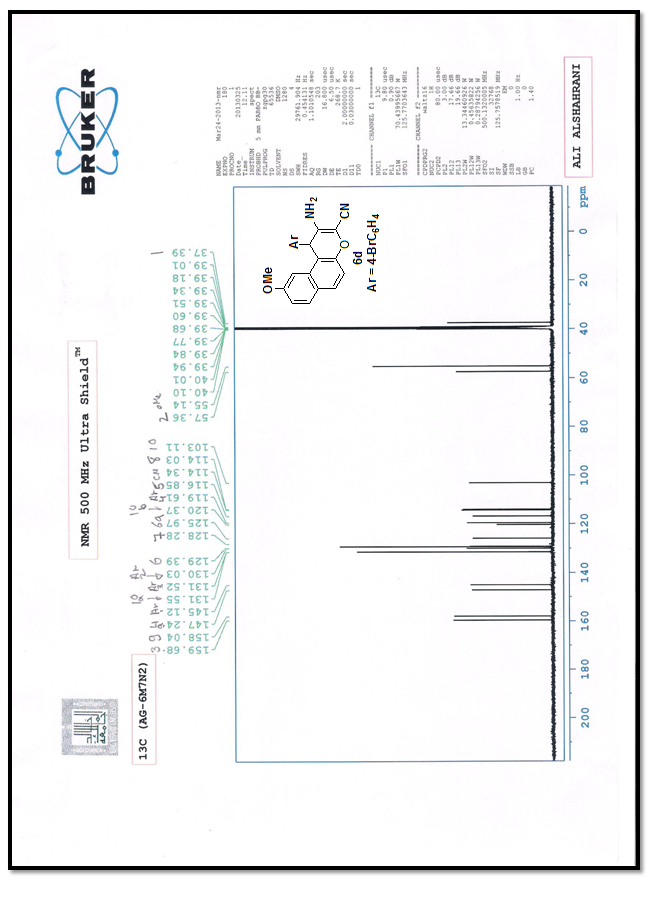

Supplement: Supplementary file 59 [file 6d_13C_NMR.docx]

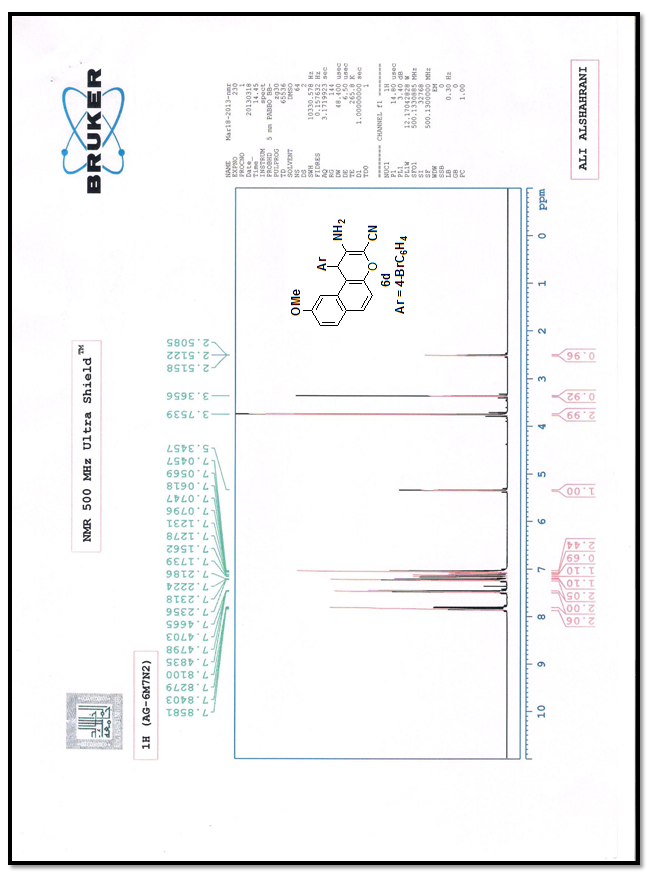

Supplement: Supplementary file 60 [file 6d_1H_NMR.docx]

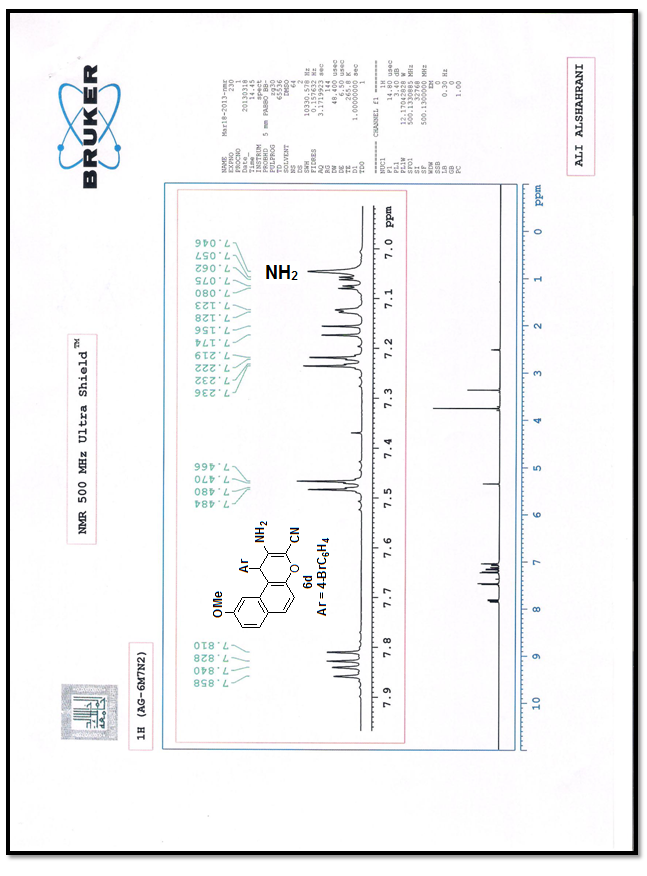

Supplement: Supplementary file 61 [file 6d_1H_NMR_8-6_ppm.docx]

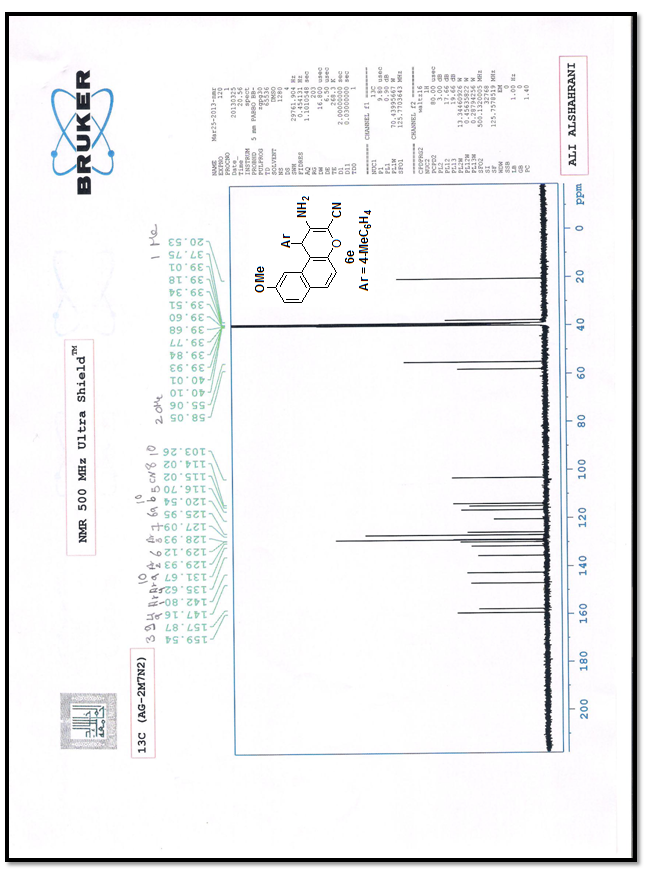

Supplement: Supplementary file 62 [file 6e_13C_NMR.docx]

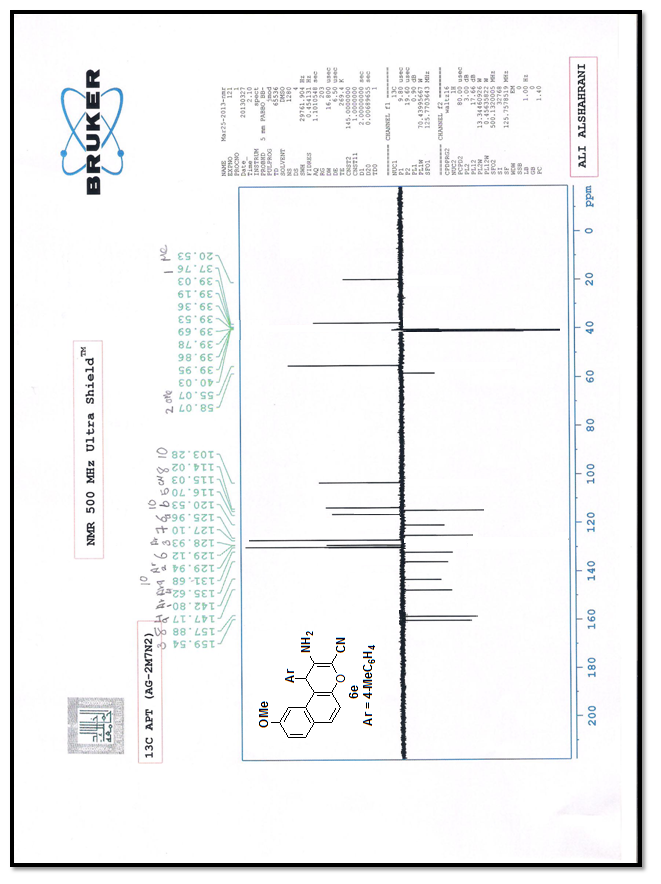

Supplement: Supplementary file 63 [file 6e_13C_NMR_APT.docx]

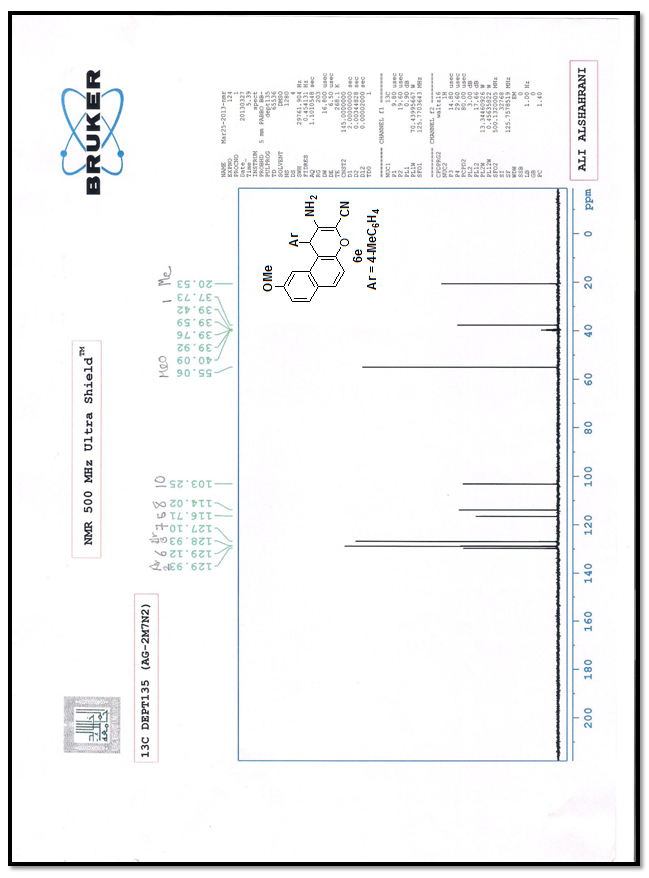

Supplement: Supplementary file 64 [file 6e_13C_NMR_DEPT_135.docx]

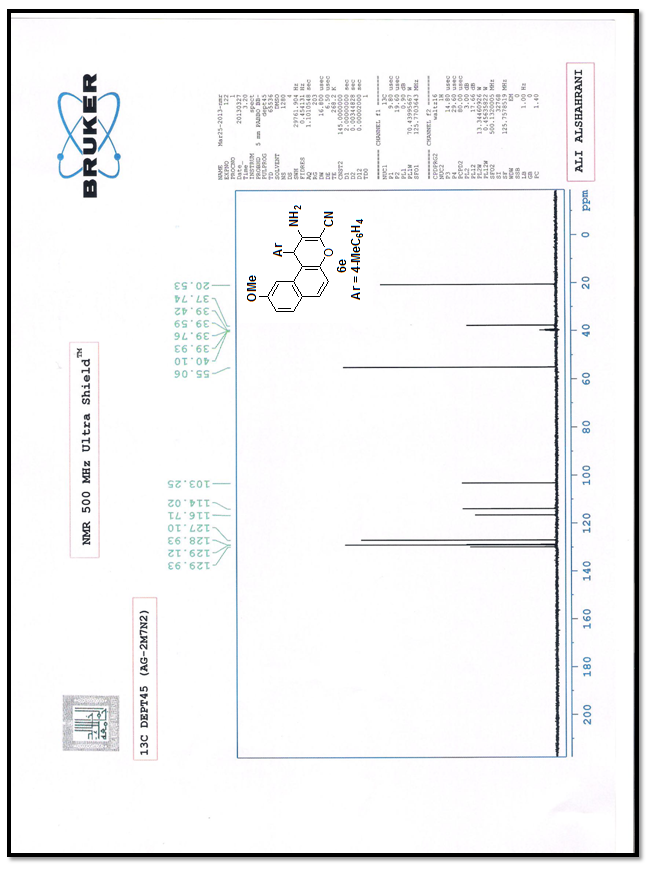

Supplement: Supplementary file 65 [file 6e_13C_NMR_DEPT_45.docx]

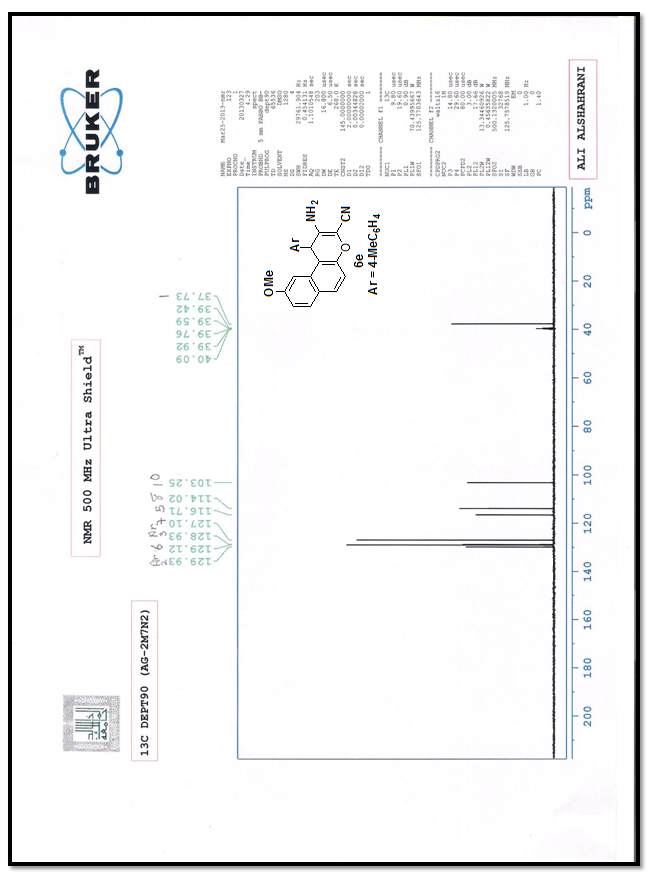

Supplement: Supplementary file 66 [file 6e_13C_NMR_DEPT_90.docx]

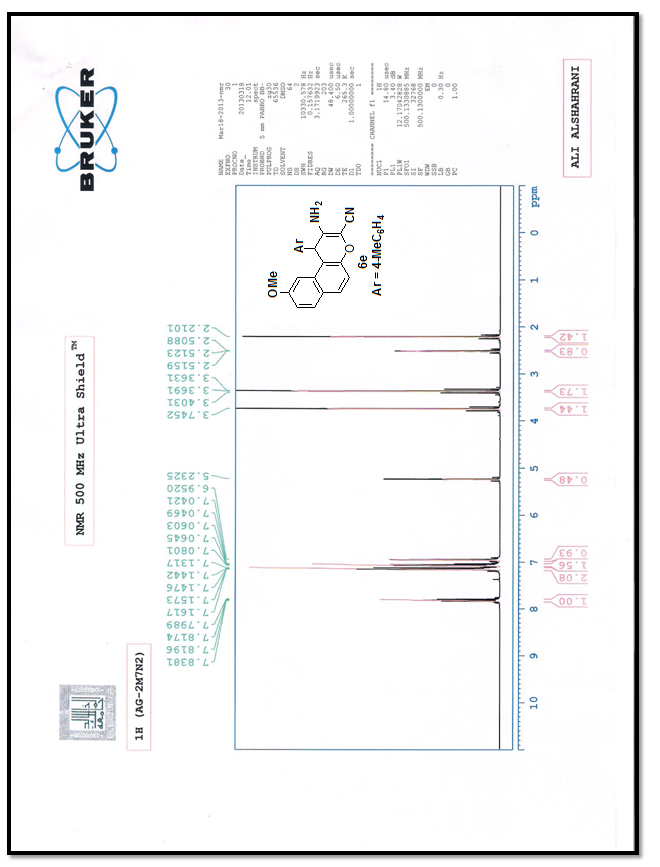

Supplement: Supplementary file 67 [file 6e_1H_NMR.docx]

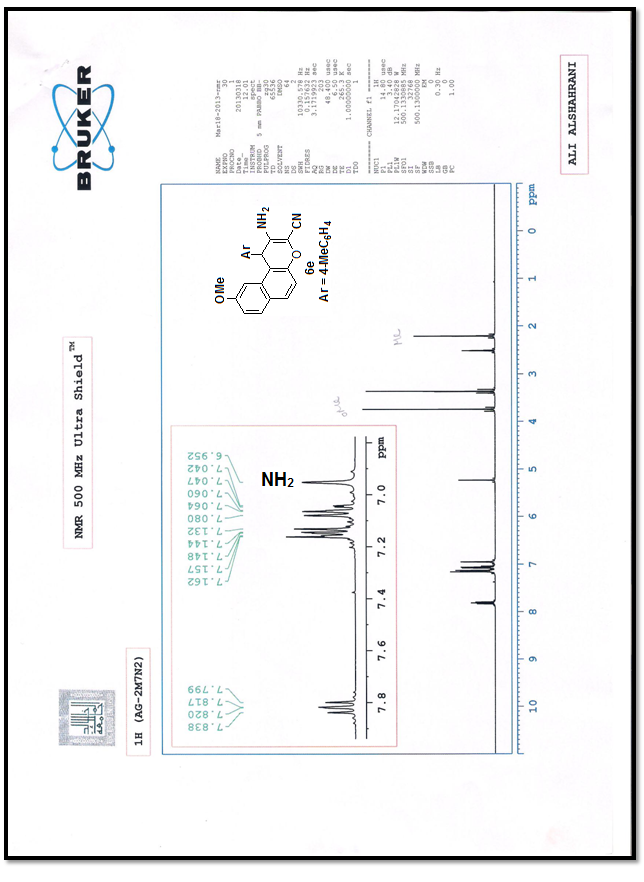

Supplement: Supplementary file 68 [file 6e_1H_NMR_8-6_ppm.docx]

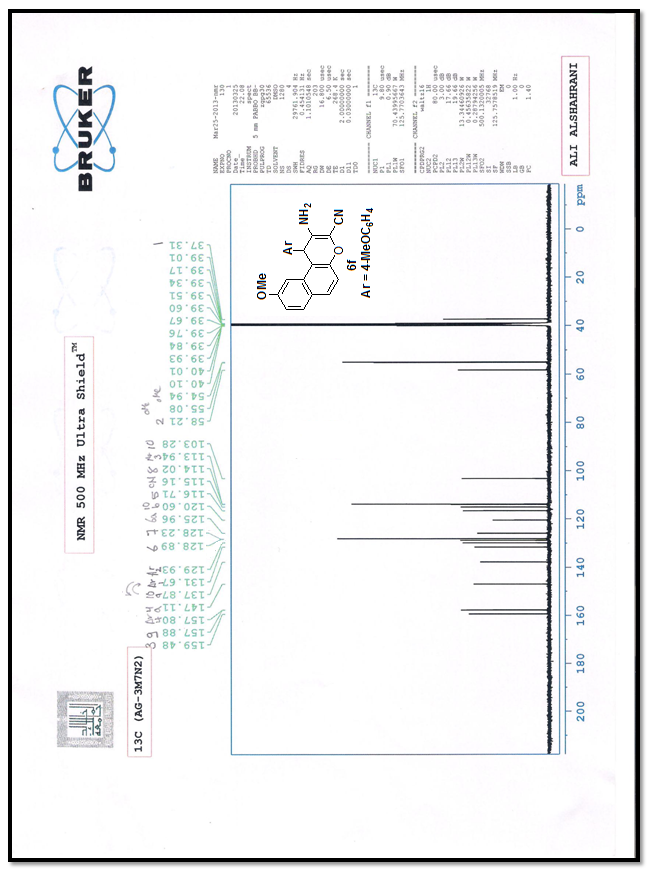

Supplement: Supplementary file 69 [file 6f_13C_NMR.docx]

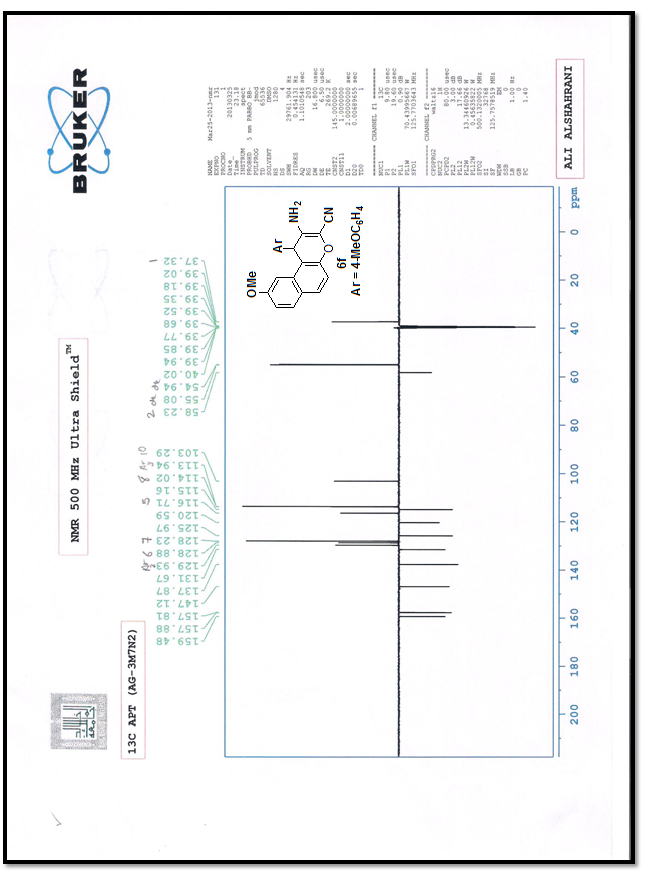

Supplement: Supplementary file 70 [file 6f_13C_NMR_APT.docx]

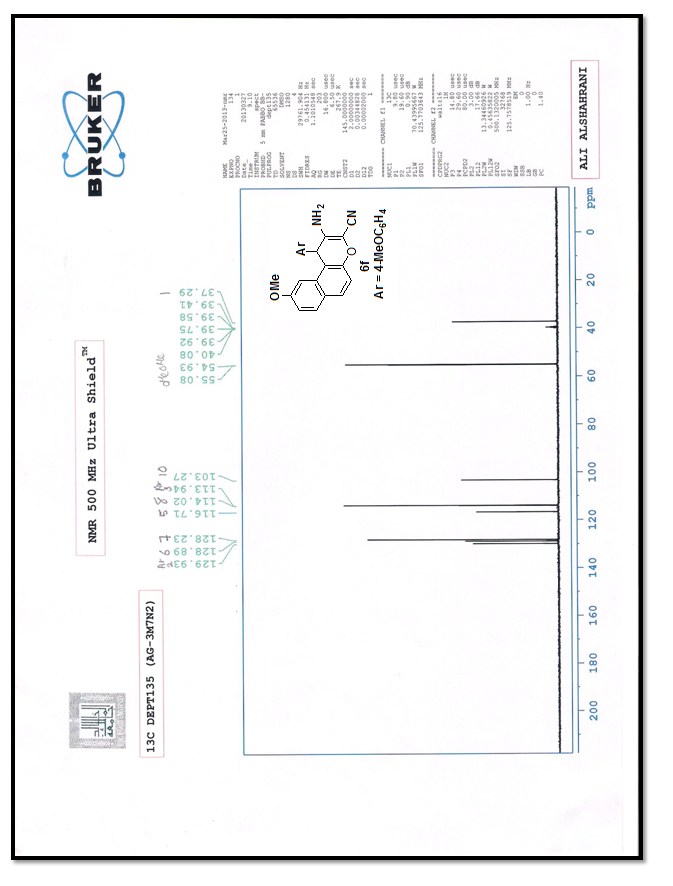

Supplement: Supplementary file 71 [file 6f_13C_NMR_DEPT_135.docx]

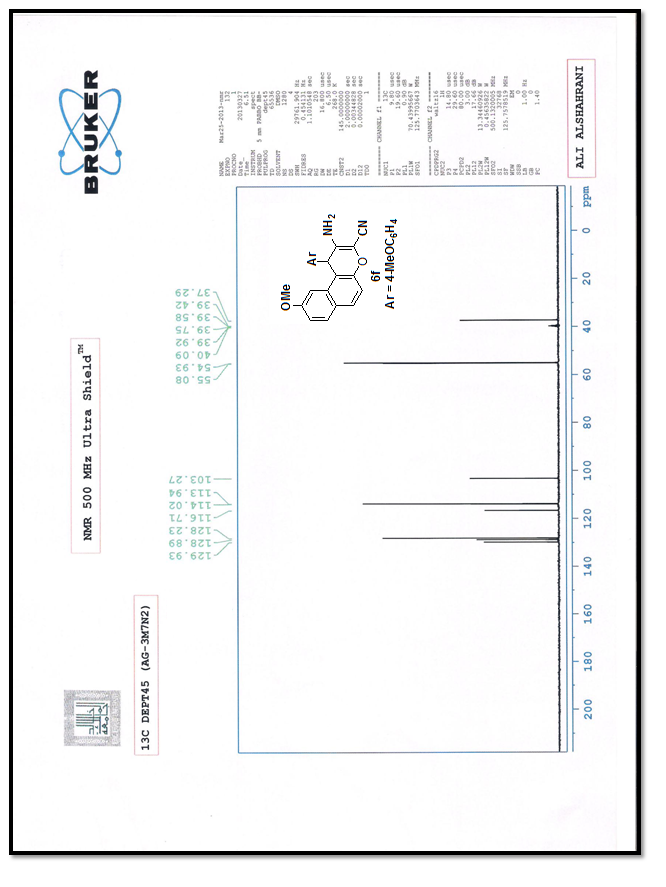

Supplement: Supplementary file 72 [file 6f_13C_NMR_DEPT_45.docx]

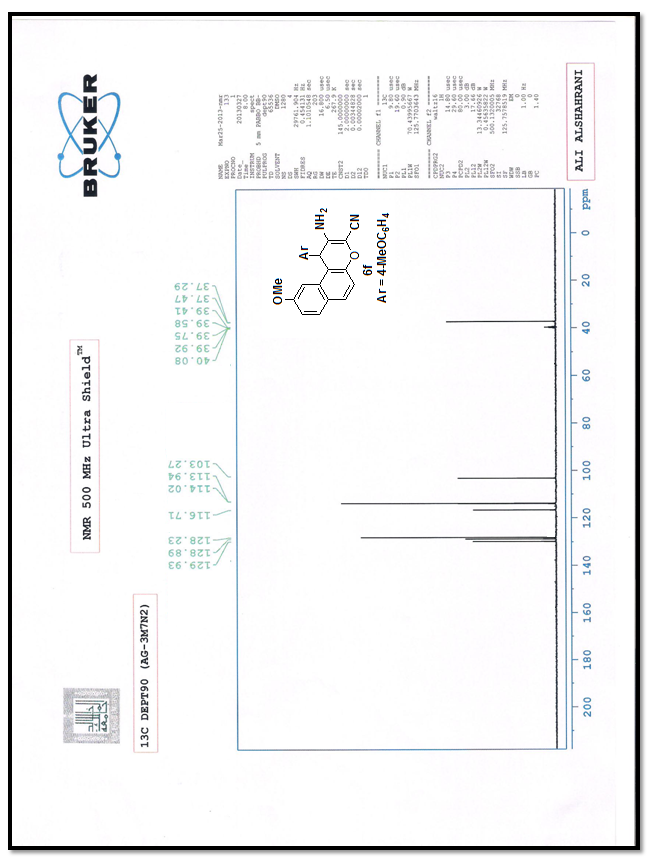

Supplement: Supplementary file 73 [file 6f_13C_NMR_DEPT_90.docx]

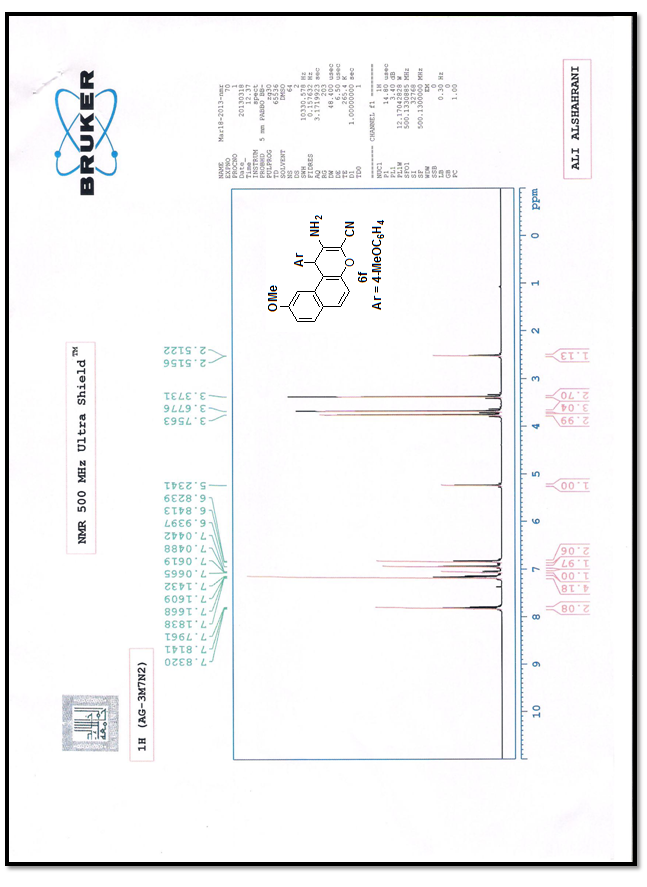

Supplement: Supplementary file 74 [file 6f_1H_NMR.docx]

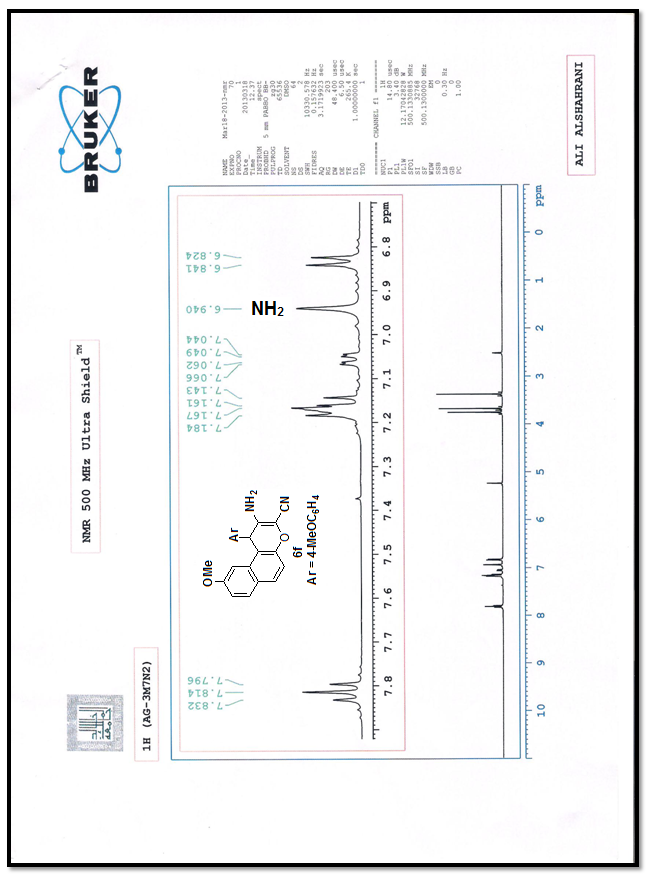

Supplement: Supplementary file 75 [file 6f_1H_NMR_8-6_ppm.docx]

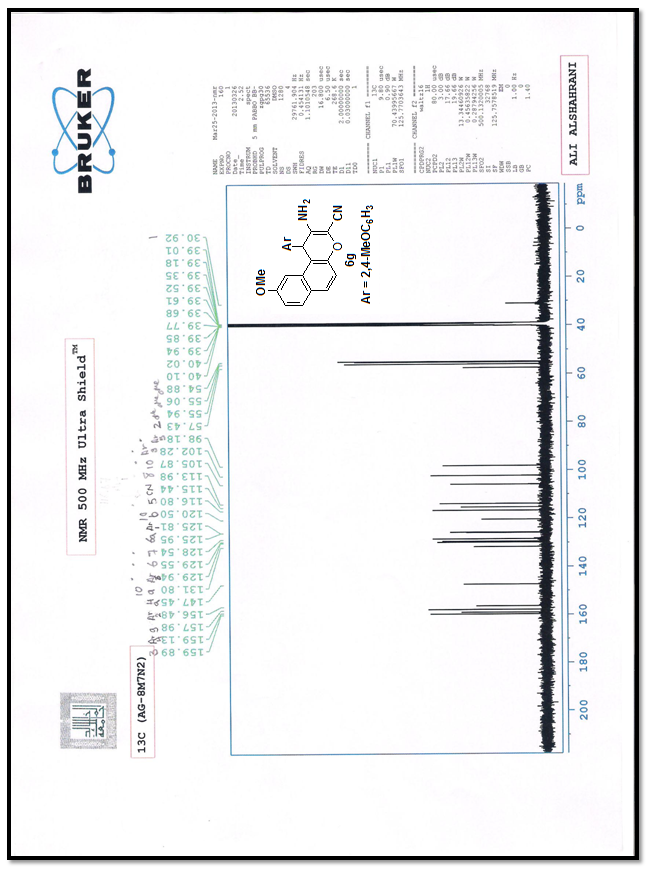

Supplement: Supplementary file 76 [file 6g_13C_NMR.docx]

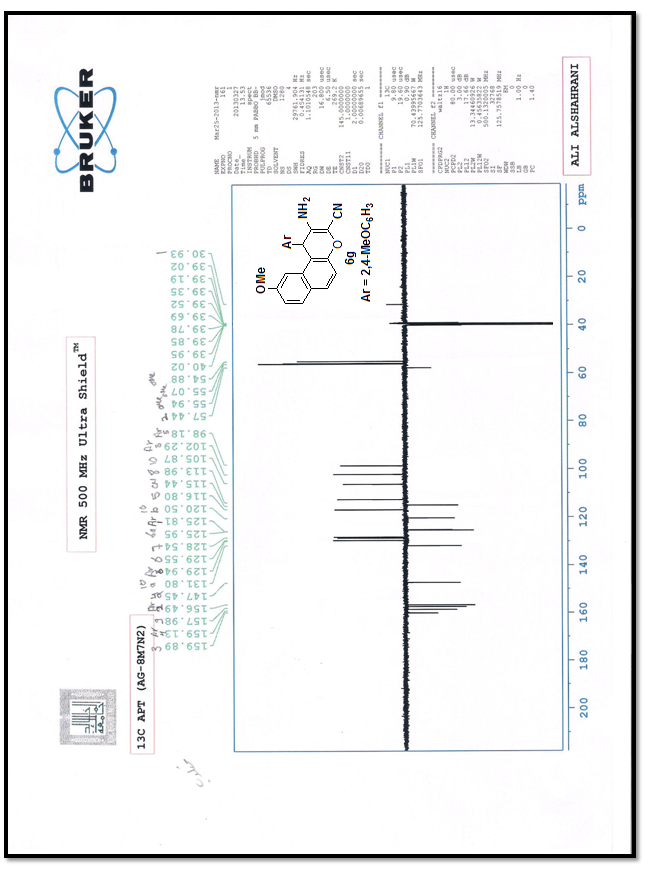

Supplement: Supplementary file 77 [file 6g_13C_NMR_APT.docx]

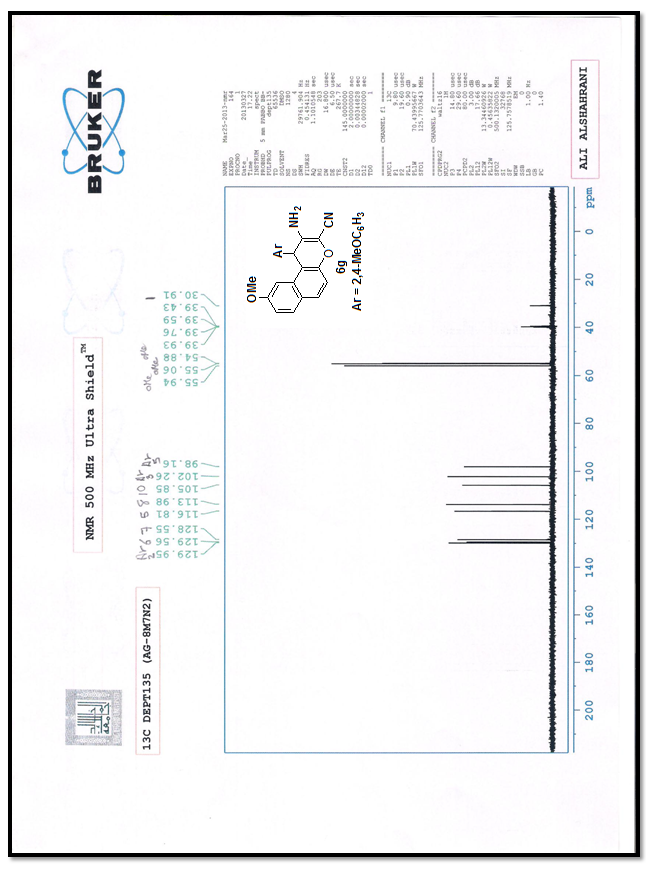

Supplement: Supplementary file 78 [file 6g_13C_NMR_DEPT_135.docx]

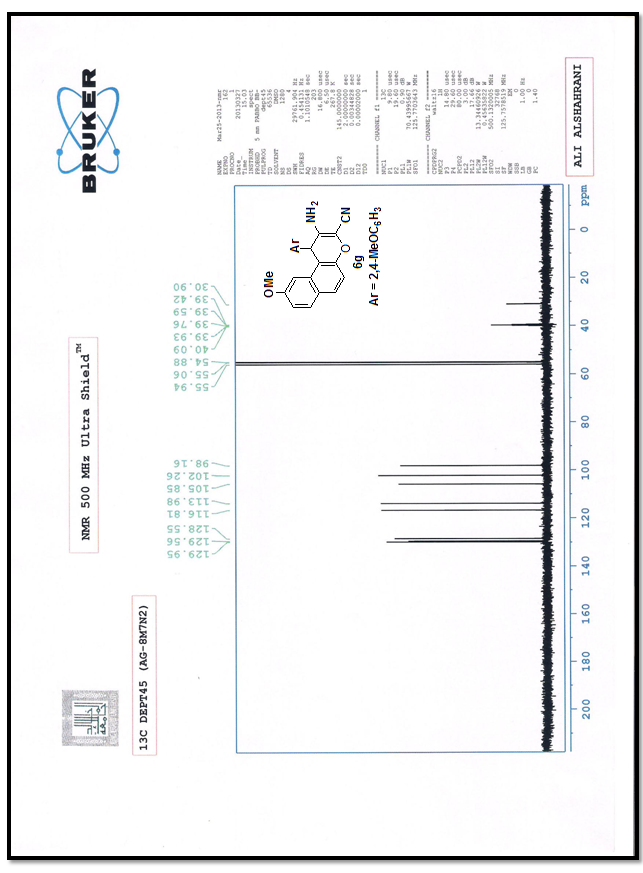

Supplement: Supplementary file 79 [file 6g_13C_NMR_DEPT_45.docx]

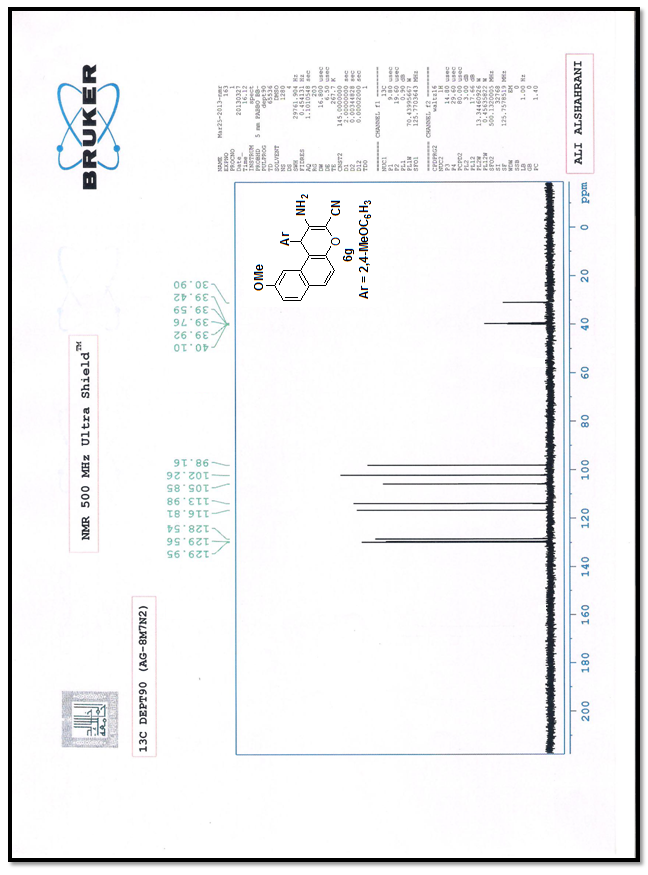

Supplement: Supplementary file 80 [file 6g_13C_NMR_DEPT_90.docx]

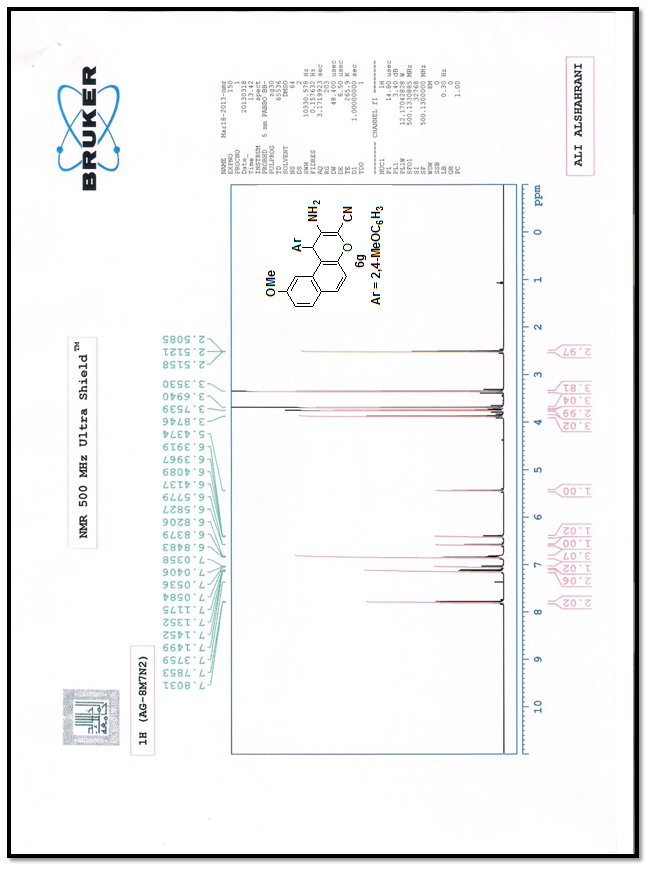

Supplement: Supplementary file 81 [file 6g_1H_NMR.docx]

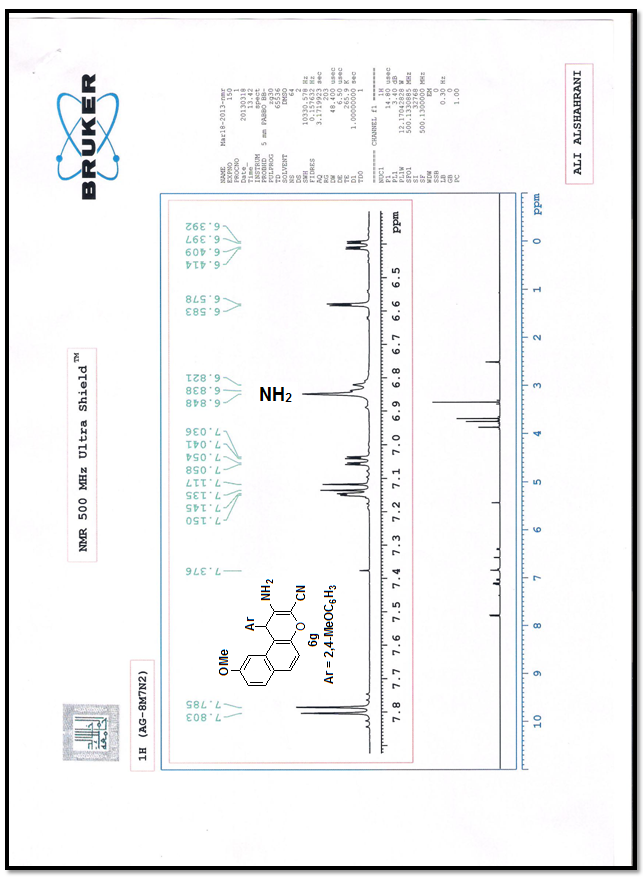

Supplement: Supplementary file 82 [file 6g_1H_NMR_8-6_ppm.docx]

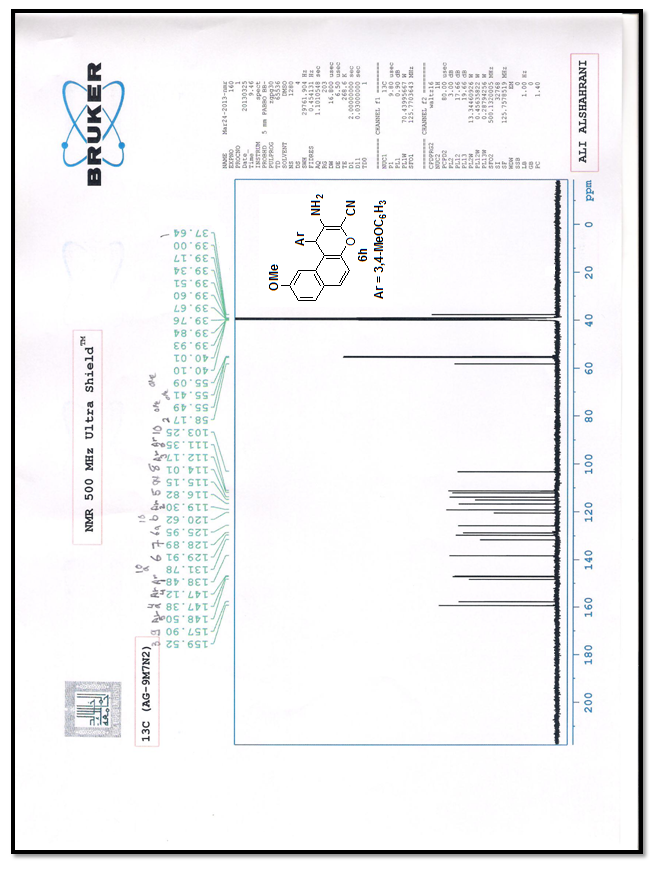

Supplement: Supplementary file 83 [file 6h_13C_NMR.docx]

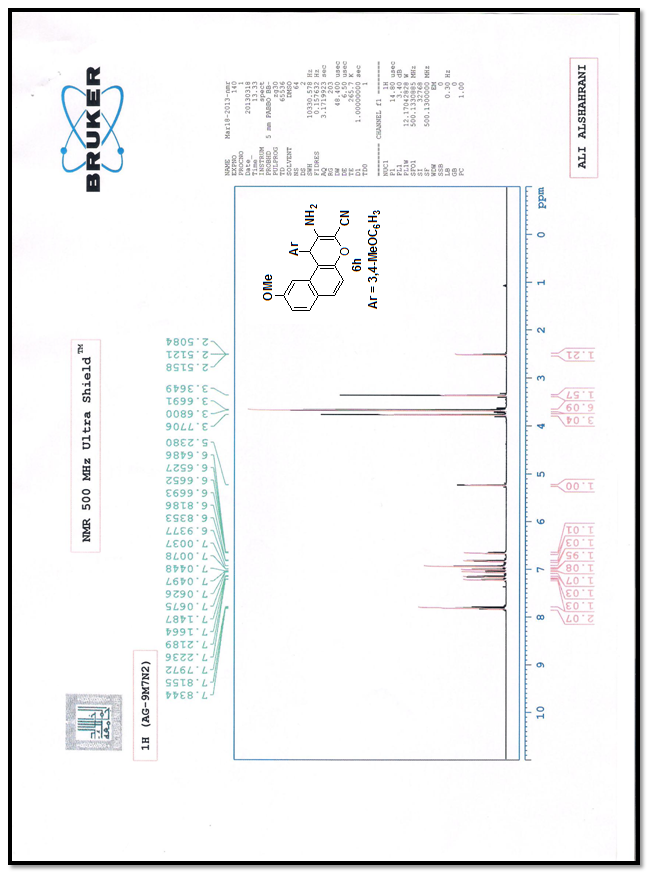

Supplement: Supplementary file 84 [file 6h_1H_NMR.docx]

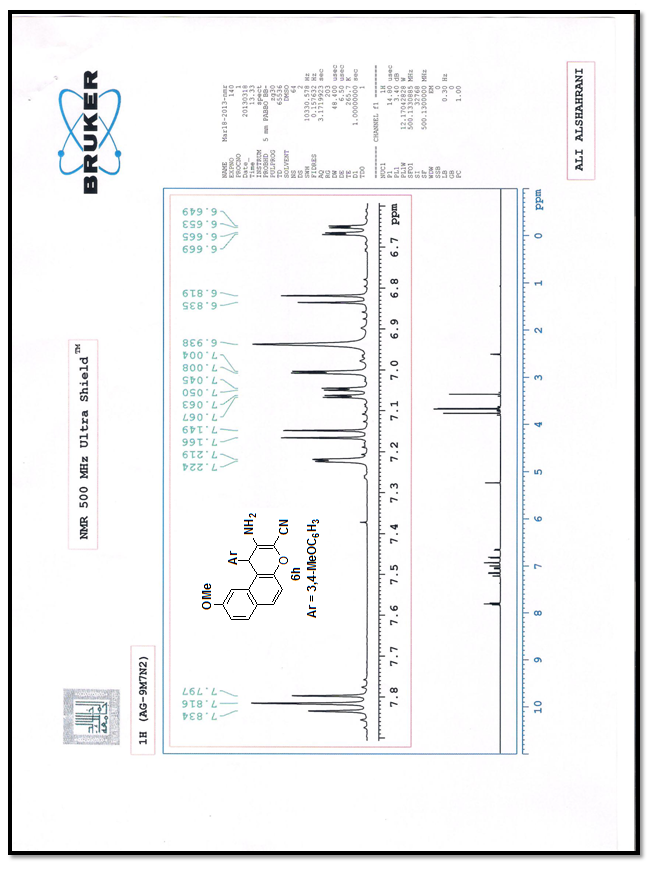

Supplement: Supplementary file 85 [file 6h_1H_NMR_8-6_ppm.docx]
